# Supplementary material for: A corannulene-based metallobox for the encapsulation of fullerenes
Source: Royal Society of Chemistry journal article supplement (doi:10.1039/d4sc03661a), 2024-01-01
Supplement: d4sc03661a1.pdf [file d4sc03661a1.pdf]

## Supporting information

*Susana Ibáñez,<sup>\*[a]</sup> Carmen Mejuto,<sup>[a]</sup> Katherin Cerón,<sup>[a]</sup> Pablo J. Sanz-Miguel<sup>[b]</sup> and Eduardo Peris<sup>\*[a]</sup>*

[a] Dr. Susana Ibáñez, Dr. Carmen Mejuto, Ms. Katherin Cerón and Prof. E. Peris  
Institute of Advanced Materials (INAM). Universitat Jaume I . Av. Vicente Sos  
Baynat s/n. Castellón. E-12071. Spain. E-mail: maella@uji.es, eperis@uji.es

[b] Dr. Pablo J. Sanz-Miguel  
Departamento de Química Inorgánica, Instituto de Síntesis Química y Catálisis  
Homogénea (ISQCH), Universidad de Zaragoza-CSIC. 50009 Zaragoza, Spain

|                                                                                                                                                              |                |
|--------------------------------------------------------------------------------------------------------------------------------------------------------------|----------------|
| <b>General considerations</b>                                                                                                                                | <b>S1</b>      |
| <b>1. Synthesis and characterization of the compounds</b>                                                                                                    | <b>S1</b>      |
| <b>2. Spectroscopic data</b>                                                                                                                                 | <b>S6-S15</b>  |
| 2.1. <sup>1</sup> H, <sup>19</sup> F, <sup>13</sup> C and <sup>1</sup> H- <sup>13</sup> C HSQC NMR spectra of <b>A</b>                                       | S6             |
| 2.2. <sup>1</sup> H, <sup>13</sup> C and <sup>1</sup> H- <sup>13</sup> C HSQC NMR spectra of <b>1</b>                                                        | S8             |
| 2.3. <sup>1</sup> H, <sup>13</sup> C and <sup>1</sup> H- <sup>13</sup> C HSQC NMR spectra of <b>2</b>                                                        | S9             |
| 2.4. <sup>1</sup> H, <sup>19</sup> F, <sup>13</sup> C, <sup>1</sup> H- <sup>13</sup> C HSQC and <sup>1</sup> H- <sup>13</sup> C HMBC NMR spectra of <b>3</b> | S10            |
| 2.5. <sup>1</sup> H, <sup>13</sup> C and <sup>1</sup> H- <sup>13</sup> C HSQC NMR spectra of C <sub>60</sub> @ <b>3</b>                                      | S13            |
| 2.6. <sup>1</sup> H, <sup>13</sup> C and <sup>1</sup> H- <sup>13</sup> C HSQC NMR spectra of C <sub>70</sub> @ <b>3</b>                                      | S14            |
| <b>3. Cyclic voltammetry studies</b>                                                                                                                         | <b>S16</b>     |
| <b>4. IR spectroscopy studies</b>                                                                                                                            | <b>S16</b>     |
| <b>5. X-Ray crystallography</b>                                                                                                                              | <b>S17-S19</b> |
| <b>6. Photophysical properties</b>                                                                                                                           | <b>S20-S21</b> |
| 6.1. UV-visible absorption spectra                                                                                                                           | S20            |
| 6.2. Emission spectra                                                                                                                                        | S21            |
| <b>7. Titration experiments</b>                                                                                                                              | <b>S22-S26</b> |
| 7.1. <sup>1</sup> H NMR titration experiments                                                                                                                | S22            |
| 7.2. ITC titration experiments                                                                                                                               | S26            |
| <b>8. Encapsulation experiments with fullerenes</b>                                                                                                          | <b>S27-S29</b> |
| <b>9. Variable-temperature <sup>1</sup>H NMR experiments</b>                                                                                                 | <b>S30-S31</b> |
| <b>10. DOSY experiment</b>                                                                                                                                   | <b>S31-S33</b> |
| <b>11. References</b>                                                                                                                                        | <b>S34</b>     |

**General considerations.** The tetraamine corannulene<sup>1</sup> was prepared according to literature methods. All other reagents were used as received from commercial suppliers. NMR spectra were recorded on a Bruker 300 MHz, Bruker 400 MHz or Varian 500 MHz using CDCl<sub>3</sub>, CD<sub>2</sub>Cl<sub>2</sub>, toluene-*d*<sub>8</sub>, and tetrachloroethane-*d*<sub>2</sub> as solvents. Infrared spectra (FTIR) were performed on a FT/IR-6200 (Jasco) spectrometer equipped with a Pro One ATR with a spectral window of 4000-400 cm<sup>-1</sup>. Electrospray mass spectra (ESI-MS) were recorded on a Micromass Quatro LC instrument; nitrogen was employed as drying and nebulizing gas. Elemental analyses were carried out on a TruSpec Micro Series. Isothermal titration was performed on a TA Nano Isothermal Titration Calorimeter at 25 °C. Electrochemical studies were carried out by using an Autolab Potentiostat (Model PGSTAT101) using a three-electrode cell. The cell was equipped with platinum working and counter electrodes, as well as a silver wire reference electrode. In all experiments, [NBu<sub>4</sub>](PF<sub>6</sub>) (0.1 M in dry CH<sub>2</sub>Cl<sub>2</sub>) was used as the supporting electrolyte with analyze concentration of approximately 1 mM. Measurements were performed at 50 mVs<sup>-1</sup> scan rates. All redox potentials were referenced to the Fc/Fc<sup>+</sup> couple as internal standard with E<sub>1/2</sub>(Fc/Fc<sup>+</sup>) vs. SCE = +0.44 V.

## 1. Synthesis and characterization of the compounds.

### Synthesis of compound [A](PF<sub>6</sub>)<sub>2</sub>.

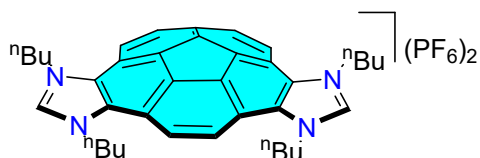

A Schlenk tube containing a mixture of tetraamine corannulene (150 mg, 0.28 mmol), 4 mL of tributyl orthoformate and NH<sub>4</sub>PF<sub>6</sub> (150 mg, 0.92 mmol) was heated at 150 °C for 12 h. A sticky precipitate crashed out from an orange solution. The solution was discarded and the precipitate was dissolved in copious amount of methanol. The solution was filtrated and removed under vacuum obtained a pale orange solid. The solid was purified by liquid-liquid extraction in H<sub>2</sub>O/CH<sub>2</sub>Cl<sub>2</sub>, then the aqueous phase was removed in vacuum obtained a yellow solid. Yield: 168 mg (71 %). HR-MS (*m/z*): 278.2 [M]<sup>2+</sup> Elemental analysis calcd (%) for C<sub>38</sub>H<sub>44</sub>N<sub>4</sub>P<sub>2</sub>F<sub>12</sub>: C, 53.90; H, 5.24; N, 6.62. Found C, 53.20; H, 5.46; N, 6.63. <sup>1</sup>H NMR (300 MHz, CD<sub>2</sub>Cl<sub>2</sub>): δ (ppm) 9.53 (s, 2H, NCHN), 8.23 (s, 2H, CH<sub>cor</sub>), 8.07 (s, 4H, CH<sub>cor</sub>), 5.01-4.75 (m, 8H, NCH<sub>2</sub>CH<sub>2</sub>CH<sub>2</sub>CH<sub>3</sub>), 2.35-2.16 (m, 8H, NCH<sub>2</sub>CH<sub>2</sub>CH<sub>2</sub>CH<sub>3</sub>), 1.71-1.53 (m, 8H, NCH<sub>2</sub>CH<sub>2</sub>CH<sub>2</sub>CH<sub>3</sub>), 1.12-1.04 (m, 12H, NCH<sub>2</sub>CH<sub>2</sub>CH<sub>2</sub>CH<sub>3</sub>). <sup>19</sup>F {<sup>1</sup>H} NMR (282 MHz, CD<sub>2</sub>Cl<sub>2</sub>): -70.53 (d, <sup>1</sup>J<sub>P-F</sub> = 711 Hz). <sup>13</sup>C {<sup>1</sup>H} NMR (75 MHz, CD<sub>2</sub>Cl<sub>2</sub>): δ (ppm) 139.41 (NCHN), 133.66 (C<sub>q</sub>), 132.18 (C<sub>q</sub>), 132.13 (C<sub>q</sub>), 130.38 (C<sub>q</sub>), 130.26 (C<sub>q</sub>), 129.92 (C<sub>q</sub>),



2.40-2.10 (m, 8H, NCH<sub>2</sub>CH<sub>2</sub>CH<sub>2</sub>CH<sub>3</sub>), 1.81-1.64 (m, 8H, NCH<sub>2</sub>CH<sub>2</sub>CH<sub>2</sub>CH<sub>3</sub>), 1.16 (t, <sup>3</sup>J<sub>H-H</sub> = 7.5 Hz, 12H, NCH<sub>2</sub>CH<sub>2</sub>CH<sub>2</sub>CH<sub>3</sub>). <sup>13</sup>C{<sup>1</sup>H} NMR (126 MHz, CDCl<sub>3</sub>): δ (ppm) 185.35 (d, <sup>1</sup>J<sub>Rh-C</sub> = 54 Hz, Rh-C<sub>Carbene</sub>), 182.84 (dd, <sup>1</sup>J<sub>Rh-C</sub> = 74 Hz, Rh-C<sub>CO</sub>), 180.48 (dd, <sup>1</sup>J<sub>Rh-C</sub> = 78 Hz, <sup>1</sup>J<sub>Rh-C</sub> = 43 Hz, Rh-C<sub>CO</sub>), 131.23 (C<sub>q</sub>), 131.06 (C<sub>q</sub>), 130.90 (C<sub>q</sub>), 130.72 (C<sub>q</sub>), 130.55 (C<sub>q</sub>), 129.79 (C<sub>q</sub>), 128.80 (C<sub>q</sub>), 128.72 (CH<sub>cor</sub>), 128.08 (C<sub>q</sub>), 127.76 (C<sub>q</sub>), 123.7 (CH<sub>cor</sub>), 122.40 (CH<sub>cor</sub>), 119.09 (C<sub>q</sub>), 118.57 (C<sub>q</sub>), 117.71 (C<sub>q</sub>), 117.27 (C<sub>q</sub>), 51.65 (NCH<sub>2</sub>CH<sub>2</sub>CH<sub>2</sub>CH<sub>3</sub>), 31.89 (NCH<sub>2</sub>CH<sub>2</sub>CH<sub>2</sub>CH<sub>3</sub>), 20.45 (NCH<sub>2</sub>CH<sub>2</sub>CH<sub>2</sub>CH<sub>3</sub>), 14.11 (NCH<sub>2</sub>CH<sub>2</sub>CH<sub>2</sub>CH<sub>3</sub>). IR (cm<sup>-1</sup>): 2083, 2003; TEP: 2055.

### Synthesis of metallobox 3.

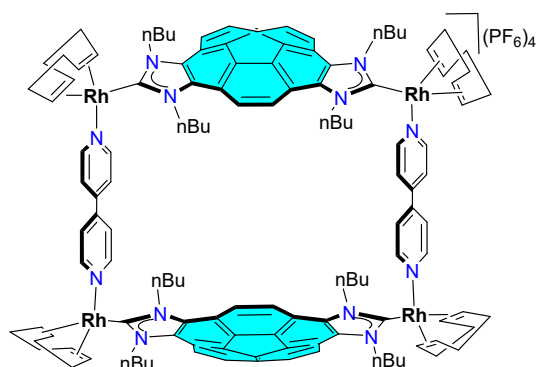

A Schlenk tube containing a mixture of compound **1** (50.5 mg, 0.05 mmol), 4,4'-bipyridine (7.5 mg, 0.05 mmol) and AgPF<sub>6</sub> (24.4 mg, 0.10 mmol) were dissolved in dichloromethane (10 mL) and stirred overnight at room temperature. The solution was filtered through a pad of Celite, the

resulting solution was concentrated to almost dryness and ether solvent was added to precipitate, yielding the desired product as a yellow solid. Yield: 61.2 mg (89 %). Elemental analysis calcd (%) for C<sub>128</sub>H<sub>148</sub>N<sub>12</sub>Rh<sub>4</sub>P<sub>4</sub>F<sub>24</sub>·2CH<sub>2</sub>Cl<sub>2</sub> (3015.583): C, 51.77; H, 5.08; N, 5.57. Found: C, 51.76; H, 4.96; N, 5.77. <sup>1</sup>H NMR (400 MHz, CD<sub>2</sub>Cl<sub>2</sub>): δ (ppm) 8.63 (d, <sup>3</sup>J<sub>H-H</sub> = 6 Hz, 4H, CH<sub>bipy</sub>), 8.52 (d, <sup>3</sup>J<sub>H-H</sub> = 6 Hz, 4H, CH<sub>bipy</sub>), 8.17 (s, 4H, CH<sub>cor</sub>), 8.10 (s, 8H, CH<sub>cor</sub>), 7.41 (d, <sup>3</sup>J<sub>H-H</sub> = 6 Hz, 4H, CH<sub>bipy</sub>), 7.31 (d, <sup>3</sup>J<sub>H-H</sub> = 6 Hz, 4H, CH<sub>bipy</sub>), 6.21-5.91 (m, 4H, NCH<sub>2</sub>CH<sub>2</sub>CH<sub>2</sub>CH<sub>3</sub>), 5.06-4.75 (m, 12H, NCH<sub>2</sub>CH<sub>2</sub>CH<sub>2</sub>CH<sub>3</sub>), 4.68 (s, 4H, CH<sub>COD</sub>), 4.47 (s, 6H, CH<sub>COD</sub>), 4.13 (s, 6H, CH<sub>COD</sub>), 3.20-2.54 (m, 16H, CH<sub>2COD</sub>), 2.45-2.15 (m, 16H, CH<sub>2COD</sub>), 2.15-1.87 (m, 16H, NCH<sub>2</sub>CH<sub>2</sub>CH<sub>2</sub>CH<sub>3</sub>), 1.82-1.49 (m, 16H, NCH<sub>2</sub>CH<sub>2</sub>CH<sub>2</sub>CH<sub>3</sub>), 1.48-1.20 (m, 24H, NCH<sub>2</sub>CH<sub>2</sub>CH<sub>2</sub>CH<sub>3</sub>). <sup>19</sup>F{<sup>1</sup>H} NMR (376 MHz, CD<sub>2</sub>Cl<sub>2</sub>): -72.49 (d, <sup>1</sup>J<sub>P-F</sub> = 714 Hz). <sup>13</sup>C{<sup>1</sup>H} NMR (100 MHz, CD<sub>2</sub>Cl<sub>2</sub>): δ (ppm) 185.40 (d, <sup>1</sup>J<sub>Rh-C</sub> = 53 Hz, Rh-C<sub>Carbene</sub>), 152.22 (C<sub>q</sub>), 151.51 (CH<sub>bipy</sub>), 150.95 (CH<sub>bipy</sub>), 145.47 (C<sub>q</sub>), 144.91 (C<sub>q</sub>), 131.98 (C<sub>q</sub>), 131.68 (C<sub>q</sub>), 131.28 (C<sub>q</sub>), 129.39 (CH<sub>cor</sub>), 124.15 (CH<sub>cor</sub>), 123.78 (CH<sub>Bipy</sub>), 123.73 (CH<sub>bipy</sub>), 123.26 (CH<sub>cor</sub>), 119.95 (C<sub>q</sub>), 118.77 (C<sub>q</sub>), 98.44 (CH<sub>COD</sub>), 86.19 (CH<sub>COD</sub>), 78.59 (CH<sub>COD</sub>), 51.94 (NCH<sub>2</sub>CH<sub>2</sub>CH<sub>2</sub>CH<sub>3</sub>), 33.02 (CH<sub>2COD</sub>), 32.59 (CH<sub>2COD</sub>), 30.88 (NCH<sub>2</sub>CH<sub>2</sub>CH<sub>2</sub>CH<sub>3</sub>), 29.83 (CH<sub>2COD</sub>), 29.55 (CH<sub>2COD</sub>), 20.86 (NCH<sub>2</sub>CH<sub>2</sub>CH<sub>2</sub>CH<sub>3</sub>), 14.23 (NCH<sub>2</sub>CH<sub>2</sub>CH<sub>2</sub>CH<sub>3</sub>).

### Synthesis of metallobox $C_{60}@3$ .

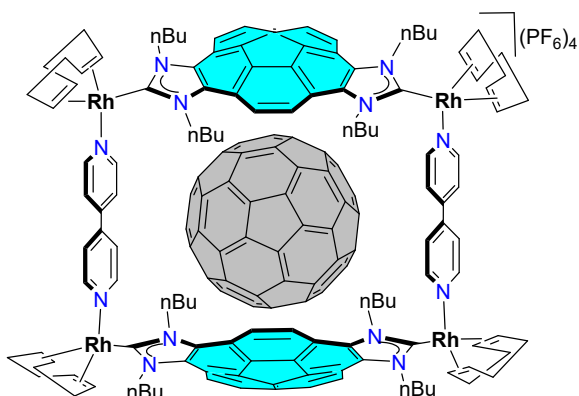

A solution of the complex **3** (25.00 mg, 0.009 mmol) and  $C_{60}$  (6.33 mg, 0.009 mmol) in dichloromethane (10 mL) was stirred overnight at room temperature for 24 h. The solution was concentrated to almost dryness. It was added ether to precipitate a brown solid. Yield: 22.80 mg (73 %). Elemental analysis calcd (%)

for  $C_{188}H_{148}N_{12}Rh_4P_4F_{24} \cdot 3CH_2Cl_2$  (3816.53): C, 60.03; H, 4.06; N, 4.40. Found: C, 60.38; H, 4.09; N, 4.49.  $^1H$  NMR (300 MHz,  $CD_2Cl_2$ ):  $\delta$  (ppm) 8.87 (d,  $^3J_{H-H} = 6.6$  Hz, 8H,  $CH_{bipy}$ ), 8.14 (s, 4H,  $CH_{cor}$ ), 8.07 (d,  $^3J_{H-H} = 8.8$  Hz, 4H,  $CH_{cor}$ ), 7.99 (d,  $^3J_{H-H} = 8.8$  Hz, 4H,  $CH_{cor}$ ), 7.81 (d,  $^3J_{H-H} = 6.9$  Hz, 8H,  $CH_{bipy}$ ), 5.86-5.69 (m, 4H,  $NCH_2CH_2CH_2CH_3$ ), 5.57-5.40 (m, 4H,  $NCH_2CH_2CH_2CH_3$ ), 5.23-4.94 (m, 8H,  $NCH_2CH_2CH_2CH_3$ ), 4.63-4.41 (m, 8H,  $CH_{COD}$ ), 4.21-4.02 (m, 8H,  $CH_{COD}$ ), 2.72-2.57 (m, 16H,  $CH_2_{COD}$ ), 2.35-2.21 (m, 16H,  $CH_2_{COD}$ ), 2.01-1.89 (m, 16H,  $NCH_2CH_2CH_2CH_3$ ), 1.63-1.52 (m, 16H,  $NCH_2CH_2CH_2CH_3$ ), 1.29-1.19 (m, 24H,  $NCH_2CH_2CH_2CH_3$ ).  $^{13}C\{^1H\}$  NMR (75 MHz,  $CD_2Cl_2$ ):  $\delta$  (ppm) 185.30 (d,  $^1J_{Rh-C} = 53$  Hz, Rh- $C_{carbene}$ ), 152.27 ( $CH_{bipy}$ ), 144.64 ( $C_q$ ), 143.79 ( $C_q$ ), 142.06 ( $C_q$ ), 140.89 ( $C_{C60}$ ), 131.86 ( $C_q$ ), 130.44 ( $C_q$ ), 129.90 ( $CH_{cor}$ ), 128.97 ( $C_q$ ), 124.91 ( $CH_{cor}$ ), 123.74 ( $CH_{bipy}$ ), 123.55 ( $CH_{cor}$ ), 119.41 ( $C_q$ ), 117.23 ( $C_q$ ), 99.93 ( $CH_{COD}$ ), 80.14 ( $CH_{COD}$ ), 79.28 ( $CH_{COD}$ ), 51.94 ( $NCH_2CH_2CH_2CH_3$ ), 33.77 ( $CH_2_{COD}$ ), 33.35 ( $CH_2_{COD}$ ), 32.28 ( $NCH_2CH_2CH_2CH_3$ ), 29.77 ( $CH_2_{COD}$ ), 29.48 ( $CH_2_{COD}$ ), 20.93 ( $NCH_2CH_2CH_2CH_3$ ), 14.37 ( $NCH_2CH_2CH_2CH_3$ ).

### Synthesis of metallobox $C_{70}@3$ .

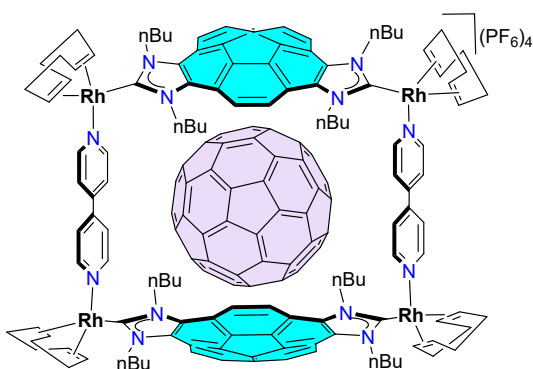

A solution of the complex **3** (22.20 mg, 0.008 mmol) and  $C_{70}$  (14.2 mg, 0.008 mmol) in dichloromethane (10 mL) was stirred overnight at room temperature for 24 h. The solution was concentrated to almost dryness. It was added ether to precipitate a brown solid. Yield: 18.60 mg (65 %). Elemental analysis calcd (%)

for  $C_{198}H_{148}N_{12}Rh_4P_4F_{24}$  (3686.680): C, 64.50; H, 4.05; N, 4.56. Found: C, 65.11; H, 4.09; N, 4.74.  $^1H$  NMR (300 MHz,  $CD_2Cl_2$ ):  $\delta$  (ppm) 8.86 (d,  $^3J_{H-H}$

= 6.0 Hz, 8H,  $CH_{\text{bipy}}$ ), 8.17 (s, 4H,  $CH_{\text{cor}}$ ), 8.13 (d,  ${}^3J_{\text{H-H}} = 9.0$  Hz, 4H,  $CH_{\text{cor}}$ ), 7.98 (d,  ${}^3J_{\text{H-H}} = 9.0$  Hz, 4H,  $CH_{\text{cor}}$ ), 7.82 (d,  ${}^3J_{\text{H-H}} = 6.0$  Hz, 8H,  $CH_{\text{bipy}}$ ), 5.74-5.47 (m, 8H,  $NCH_2CH_2CH_2CH_3$ ), 5.29-5.10 (m, 8H,  $NCH_2CH_2CH_2CH_3$ ), 4.58-4.37 (m, 8H,  $CH_{\text{COD}}$ ), 4.18-3.99 (m, 8H,  $CH_{\text{COD}}$ ), 2.77-2.52 (m, 32H,  $CH_{2\text{COD}}$ ), 2.36-2.12 (m, 16H,  $NCH_2CH_2CH_2CH_3$ ), 2.10-1.86 (m, 16H,  $NCH_2CH_2CH_2CH_3$ ), 1.39-1.15 (m, 24H,  $NCH_2CH_2CH_2CH_3$ ).  ${}^{13}\text{C}\{{}^1\text{H}\}$  NMR (75 MHz,  $\text{CD}_2\text{Cl}_2$ ):  $\delta$  (ppm) 185.14 (d,  ${}^1J_{\text{Rh-C}} = 53$  Hz, Rh- $C_{\text{Carbene}}$ ), 152.35 ( $CH_{\text{bipy}}$ ), 148.71 ( $C_{\text{C70}}$ ), 146.12 ( $C_{\text{C70}}$ ), 145.35 ( $C_{\text{C70}}$ ), 144.64 ( $C_{\text{q}}$ ), 143.79 ( $C_{\text{q}}$ ), 143.33 ( $C_{\text{C70}}$ ), 142.06 ( $C_{\text{q}}$ ), 131.86 ( $C_{\text{q}}$ ), 130.50 ( $C_{\text{q}}$ ), 130.15 ( $CH_{\text{cor}}$ ), 128.77 ( $C_{\text{q}}$ ), 125.12 ( $CH_{\text{cor}}$ ), 123.73 ( $CH_{\text{bipy}}$ ), 123.73 ( $CH_{\text{cor}}$ ), 119.21 ( $C_{\text{q}}$ ), 117.79 ( $C_{\text{q}}$ ), 100.12 ( $CH_{\text{COD}}$ ), 80.00 ( $CH_{\text{COD}}$ ), 52.09 ( $NCH_2CH_2CH_2CH_3$ ), 33.62 ( $CH_{2\text{COD}}$ ), 32.40 ( $NCH_2CH_2CH_2CH_3$ ), 29.62 ( $CH_{2\text{COD}}$ ), 20.90 ( $NCH_2CH_2CH_2CH_3$ ), 14.41 ( $NCH_2CH_2CH_2CH_3$ ).

## 2. Spectroscopic data

### 2.1. $^1\text{H}$ , $^{19}\text{F}$ , $^{13}\text{C}$ and $^1\text{H}$ - $^{13}\text{C}$ HSQC NMR spectra of A.

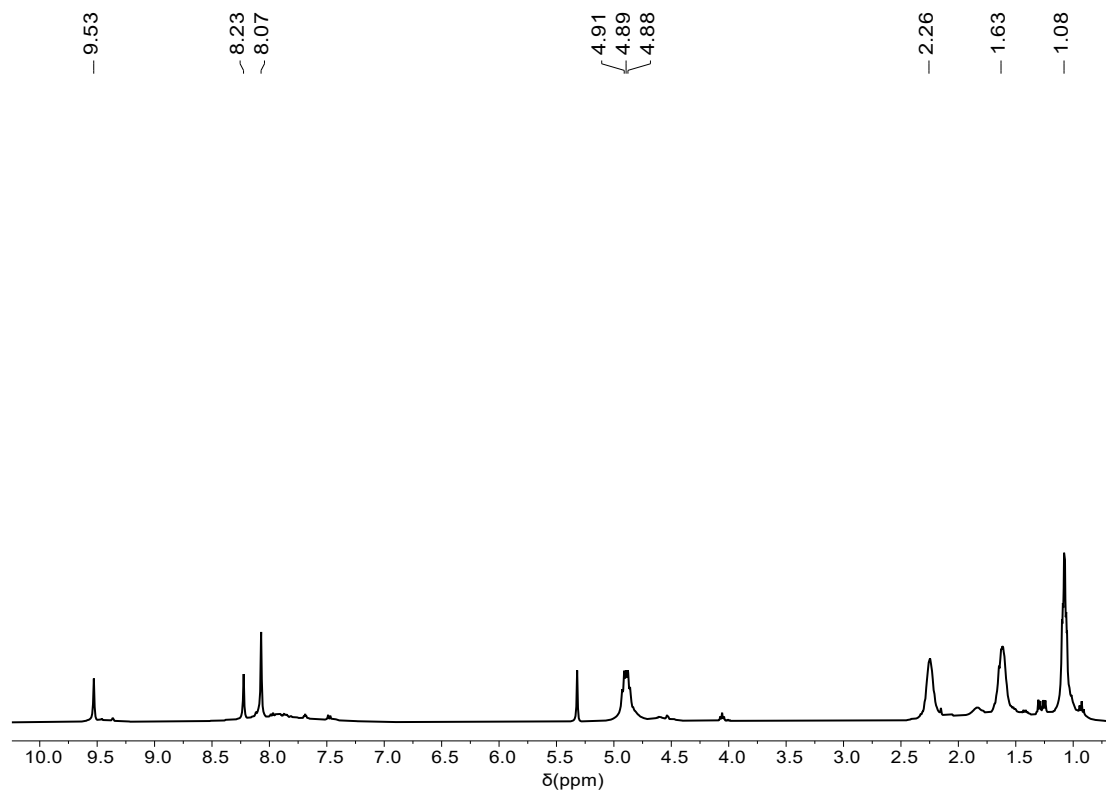

**Figure S1.**  $^1\text{H}$  NMR spectrum (300 MHz) of A in  $\text{CD}_2\text{Cl}_2$  at 298 K.

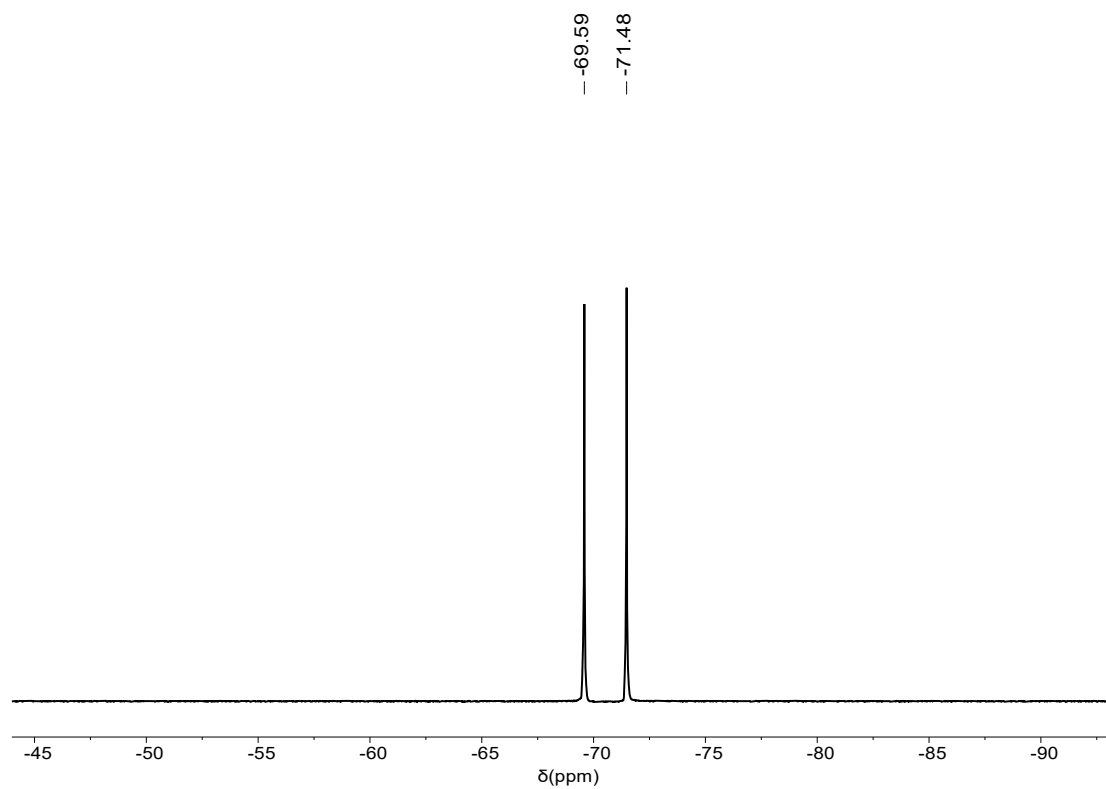

**Figure S2.**  $^{19}\text{F}$  NMR spectrum (282 MHz) of **A** in  $\text{CD}_2\text{Cl}_2$  at 298 K.

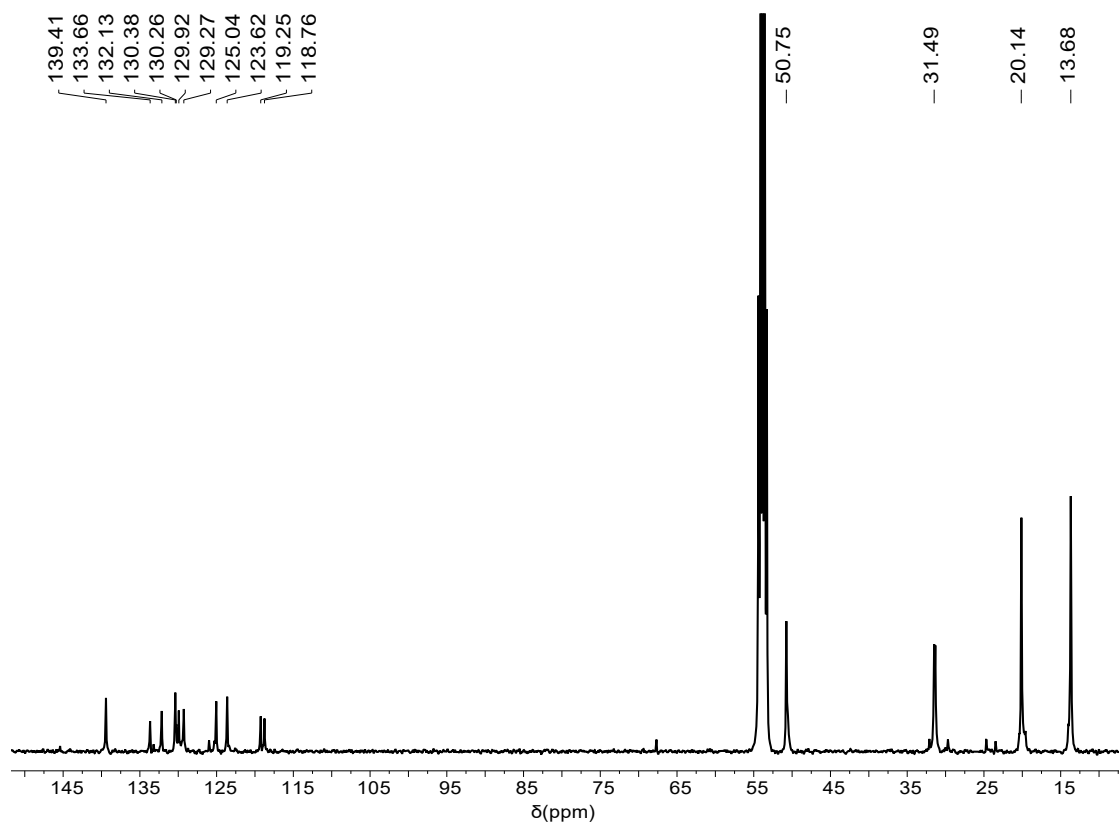

**Figure S3.**  $^{13}\text{C}$  NMR spectrum (75 MHz) of **A** in  $\text{CD}_2\text{Cl}_2$  at 298 K.

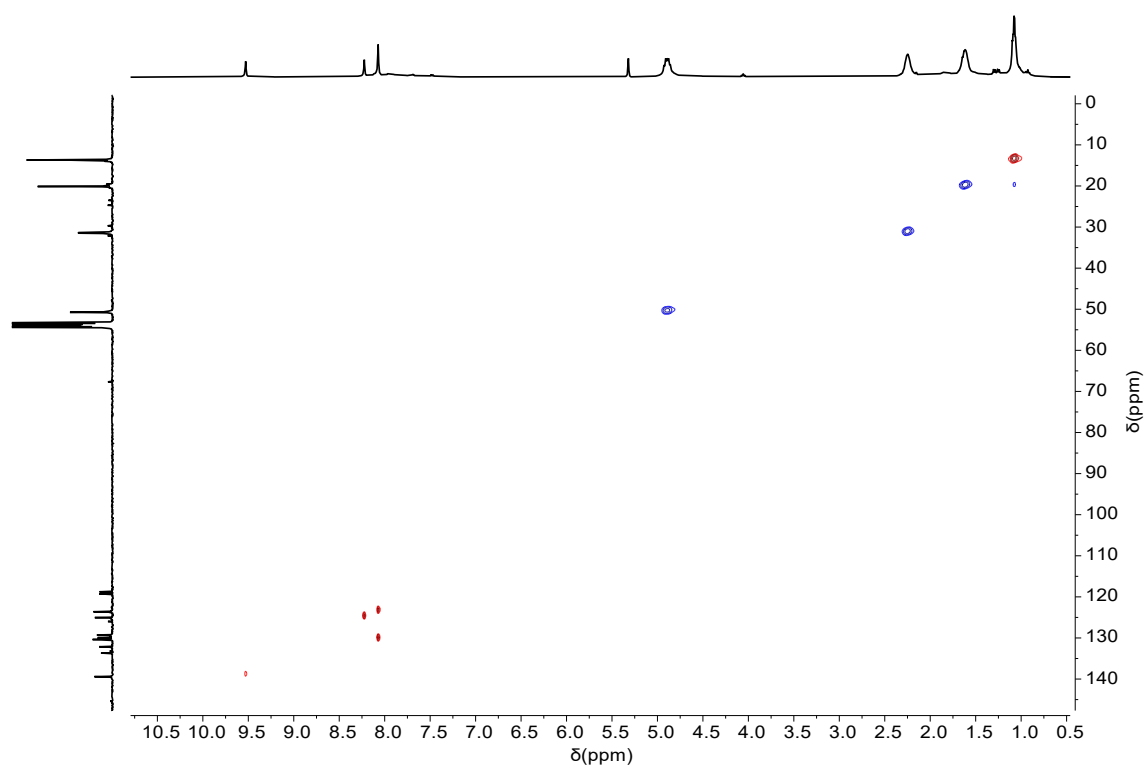



**Figure S4.** HSQC  $^1\text{H}$ - $^{13}\text{C}$  spectrum of (300 MHz) of **A** in  $\text{CD}_2\text{Cl}_2$  at 298 K.

**2.2.  $^1\text{H}$ ,  $^{13}\text{C}$  and  $^1\text{H}$ - $^{13}\text{C}$  HSQC NMR spectra of **1**.**

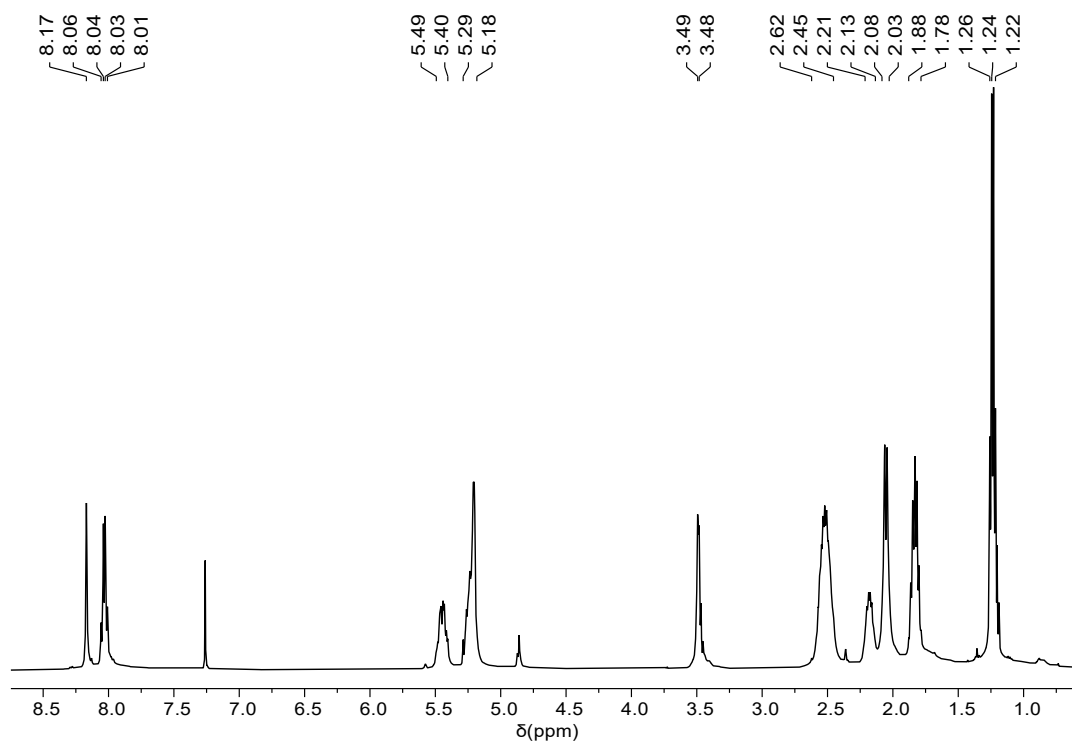

**Figure S5.**  $^{13}\text{C}$  NMR spectrum (300 MHz) of **1** in  $\text{CDCl}_3$  at 298 K.

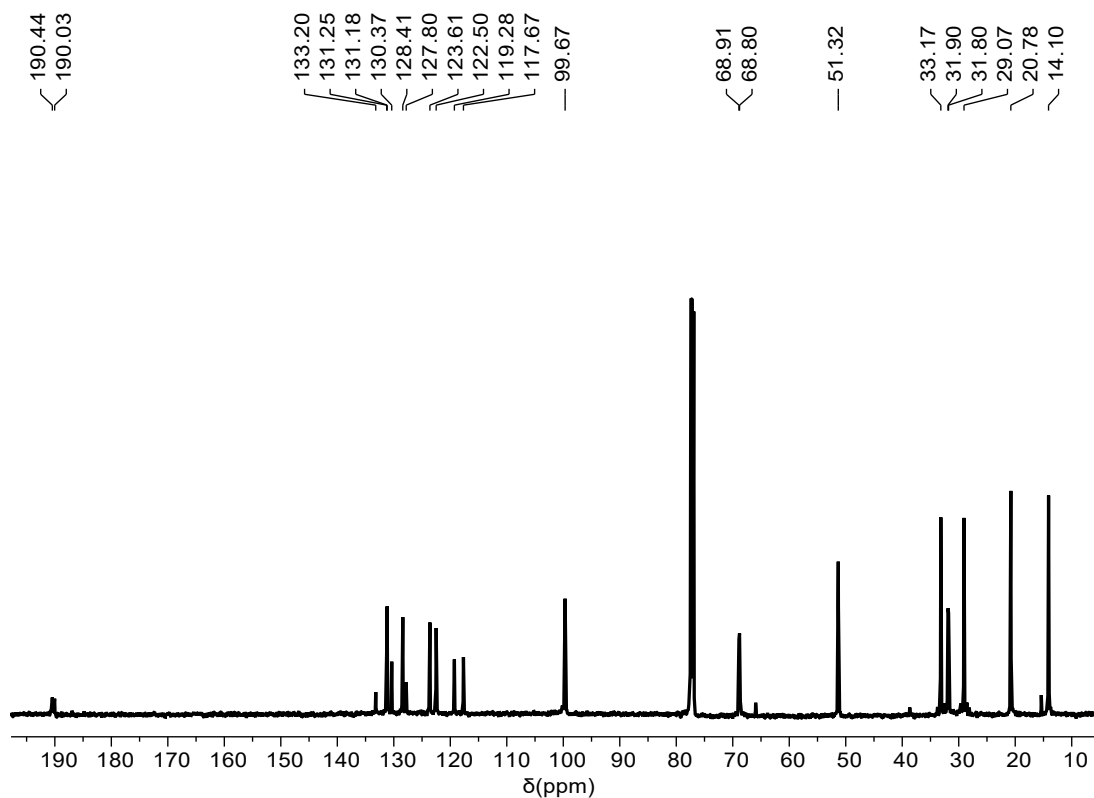

**Figure S6.**  $^{13}\text{C}$  NMR spectrum (75 MHz) of **1** in  $\text{CDCl}_3$  at 298 K.

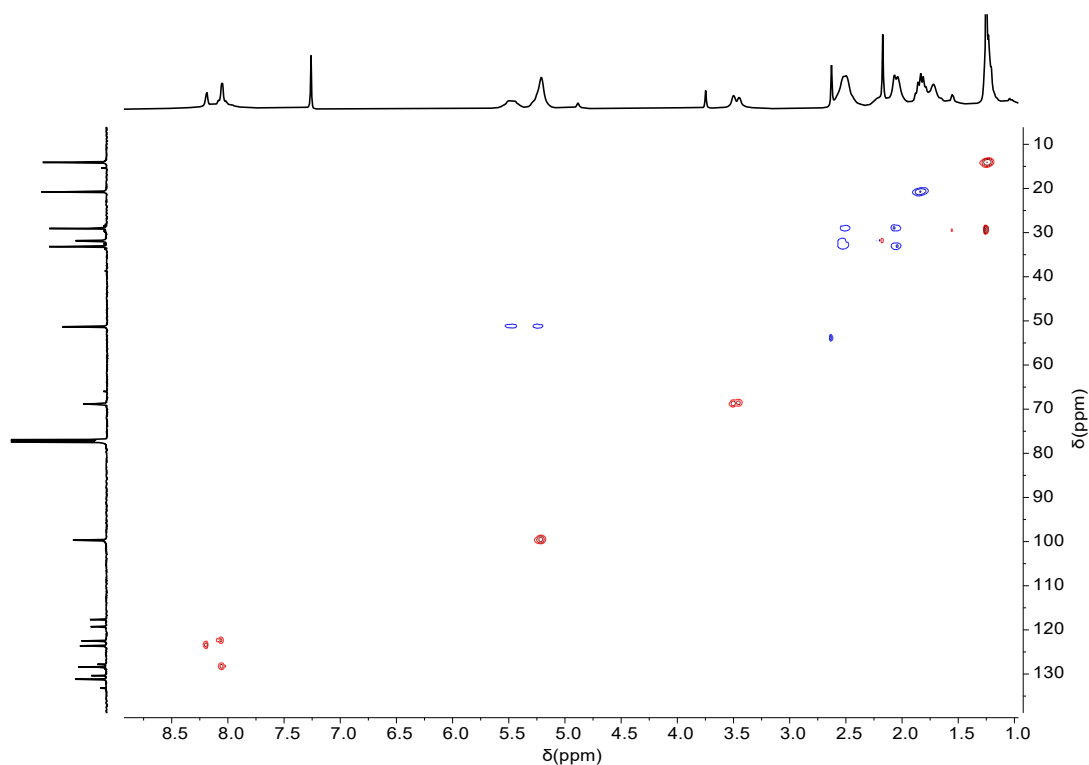

**Figure S7.** HSQC  $^1\text{H}$ - $^{13}\text{C}$  spectrum (300 MHz) of **1** in  $\text{CDCl}_3$  at 298 K.

### 2.3. $^1\text{H}$ , $^{13}\text{C}$ and $^1\text{H}$ - $^{13}\text{C}$ HSQC NMR spectra of **2**.

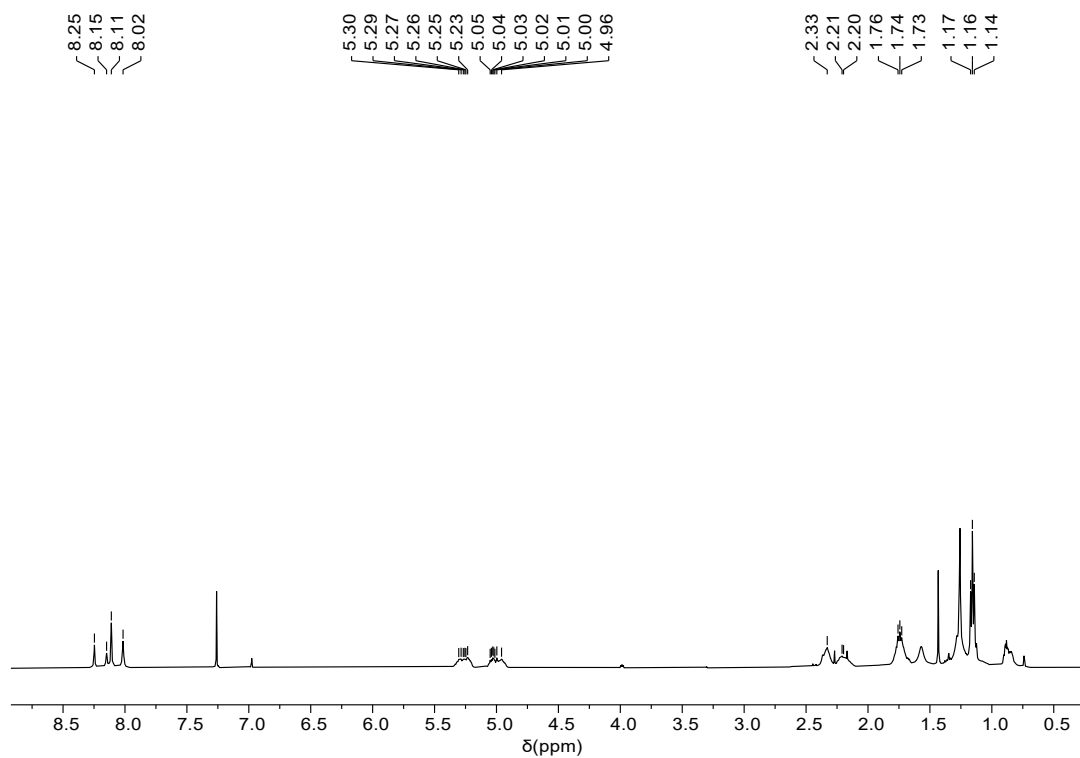

**Figure S8.**  $^1\text{H}$  NMR spectrum (500 MHz) of **2** in  $\text{CDCl}_3$  at 298 K.

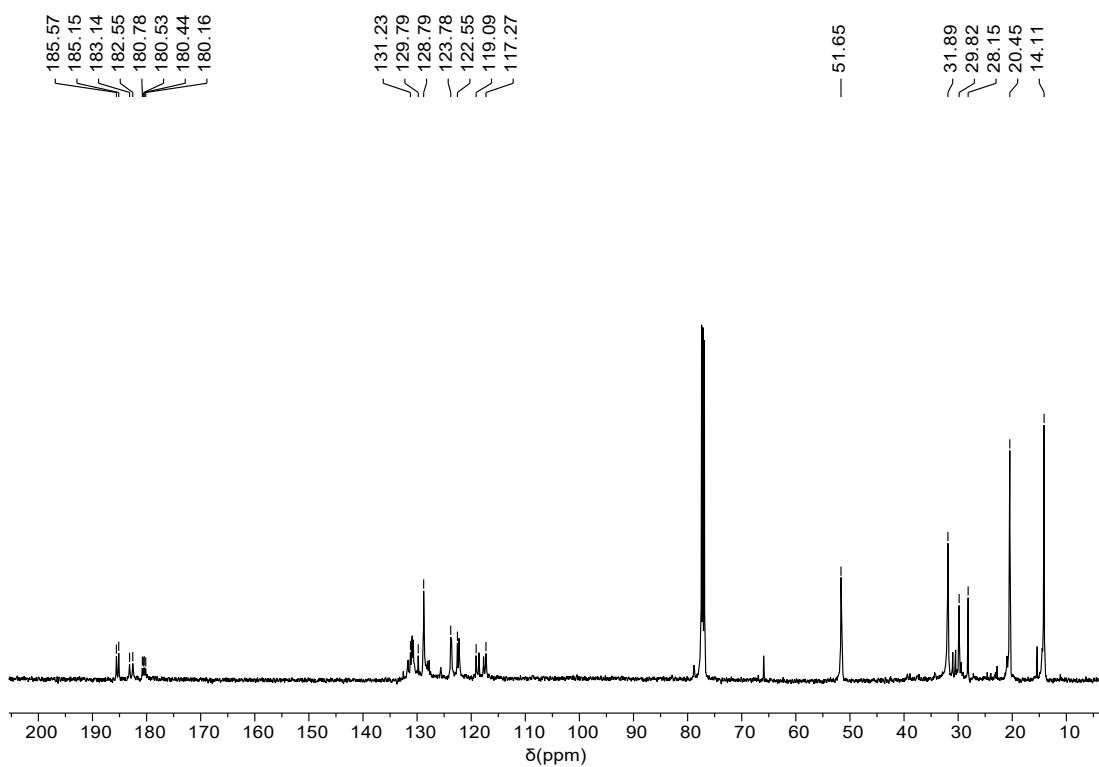

**Figure S9.**  $^{13}\text{C}$  NMR spectrum (126 MHz) of **2** in  $\text{CDCl}_3$  at 298 K.

**2.4.  $^1\text{H}$ ,  $^{19}\text{F}$ ,  $^{13}\text{C}$ ,  $^1\text{H}$ - $^{13}\text{C}$  HSQC and  $^1\text{H}$ - $^{13}\text{C}$  HMBC NMR spectra of **3**.**

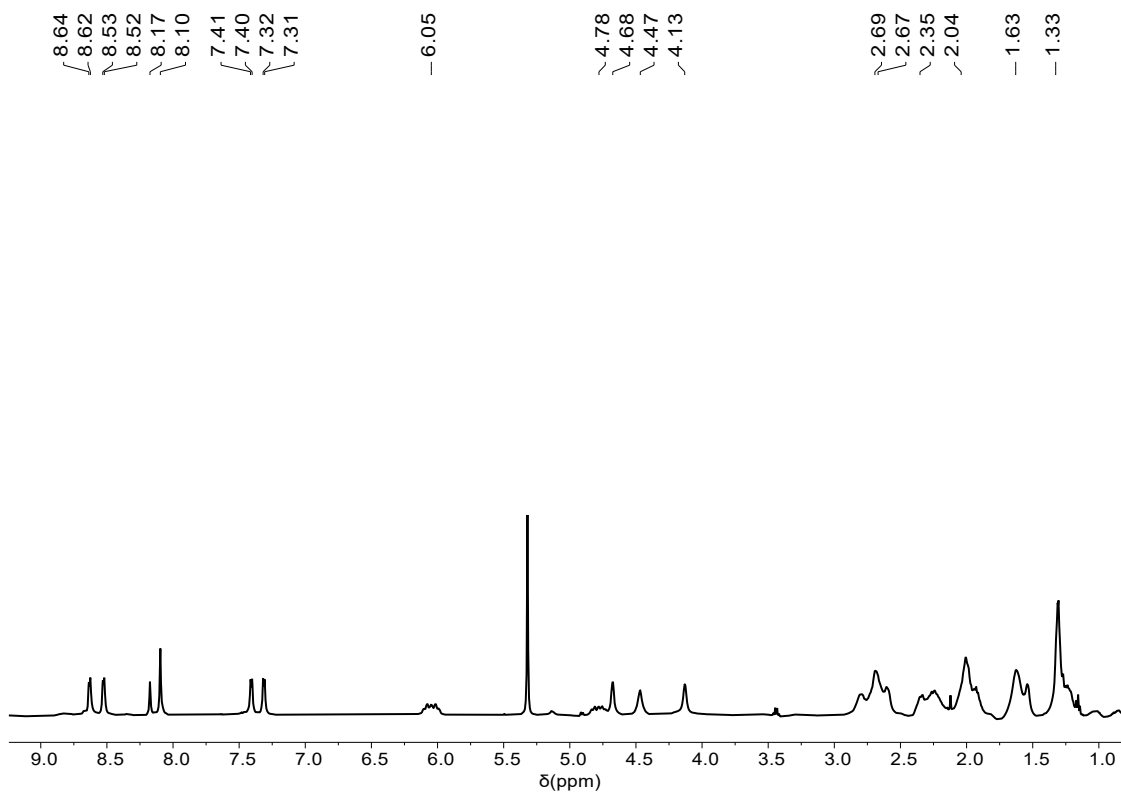

**Figure S10.**  $^1\text{H}$  NMR spectrum (400 MHz) of **3** in  $\text{CD}_2\text{Cl}_2$  at 298 K.

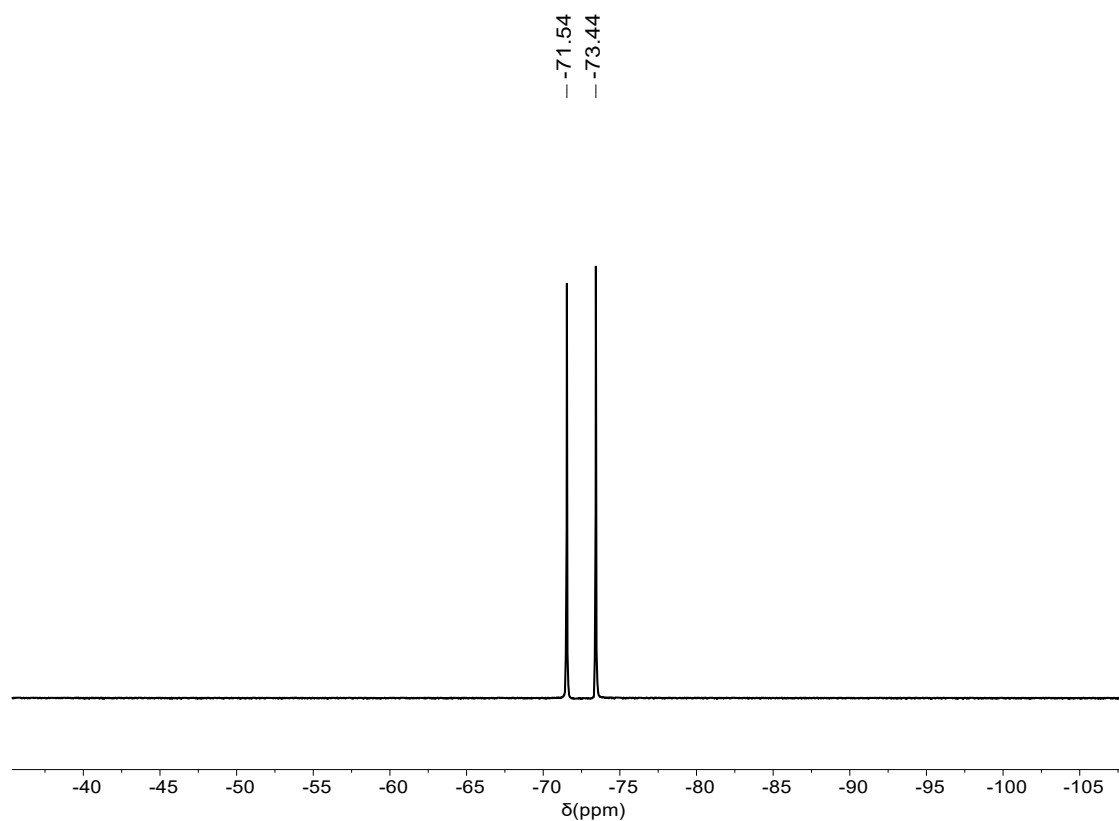

**Figure S11.**  $^{19}\text{F}$  NMR spectrum (376 MHz) of **3** in  $\text{CD}_2\text{Cl}_2$  at 298 K.

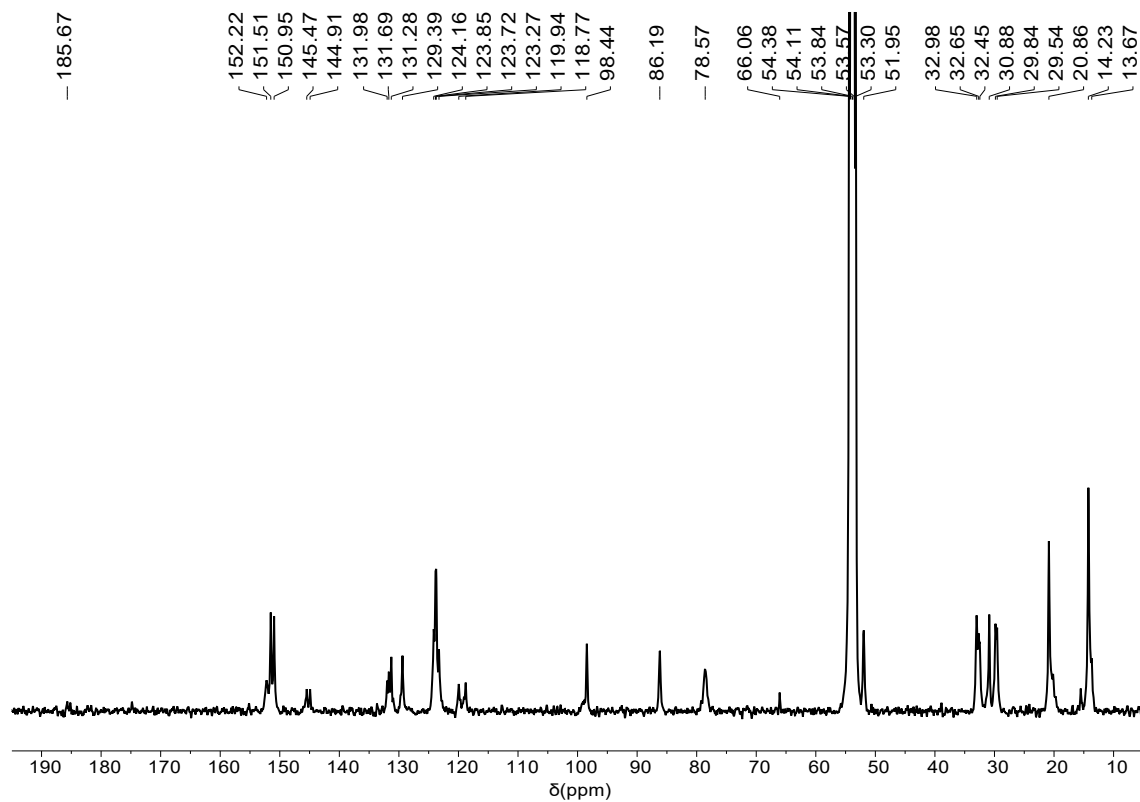

**Figure S12.**  $^{13}\text{C}$  NMR spectrum (100 MHz) of **3** in  $\text{CD}_2\text{Cl}_2$  at 298 K.

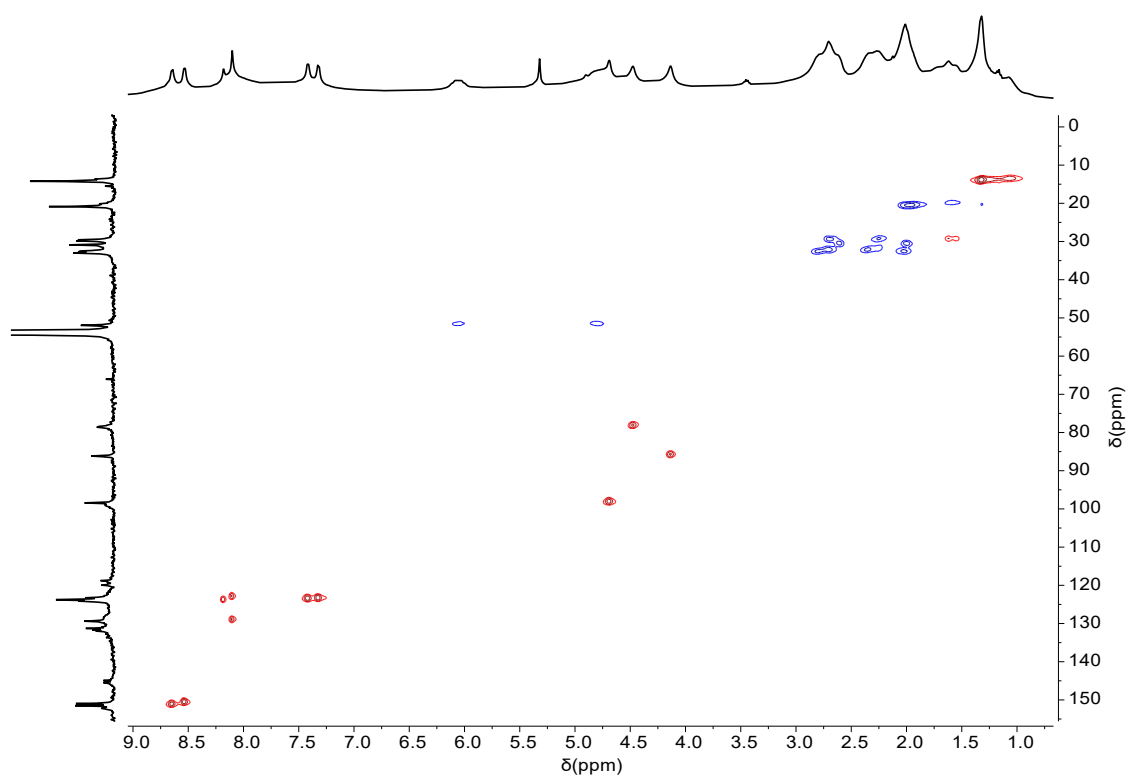

**Figure S13.**  $^1\text{H}$ - $^{13}\text{C}$  HSQC spectrum (400 MHz) of **3** in  $\text{CD}_2\text{Cl}_2$  at 298 K.

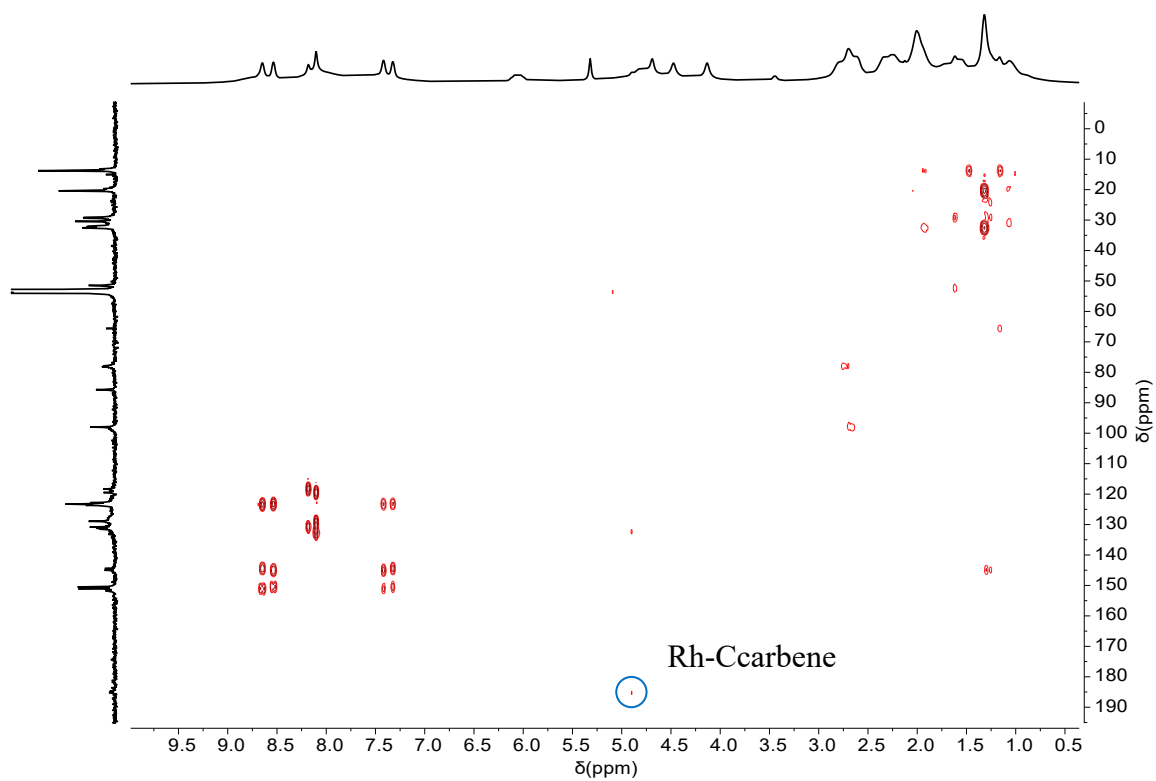

**Figure S14.**  $^1\text{H}$ - $^{13}\text{C}$  HMBC spectrum (400 MHz) of **3** in  $\text{CD}_2\text{Cl}_2$  at 298 K.

## 2.5. $^1\text{H}$ , $^{13}\text{C}$ , and $^1\text{H}$ - $^{13}\text{C}$ HSQC NMR spectra of $\text{C}_{60}@3$ .

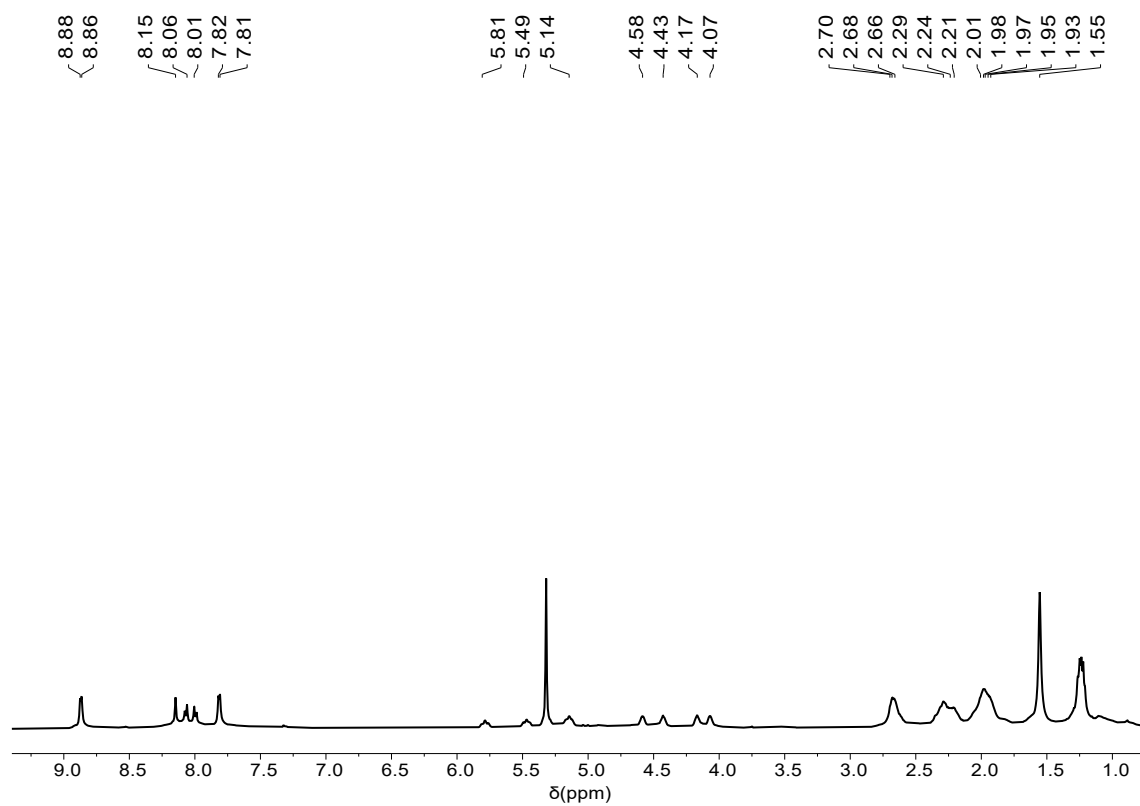

**Figure S15.**  $^1\text{H}$  NMR spectrum (300 MHz) of  $\text{C}_{60}@3$  in  $\text{CD}_2\text{Cl}_2$  at 298 K.

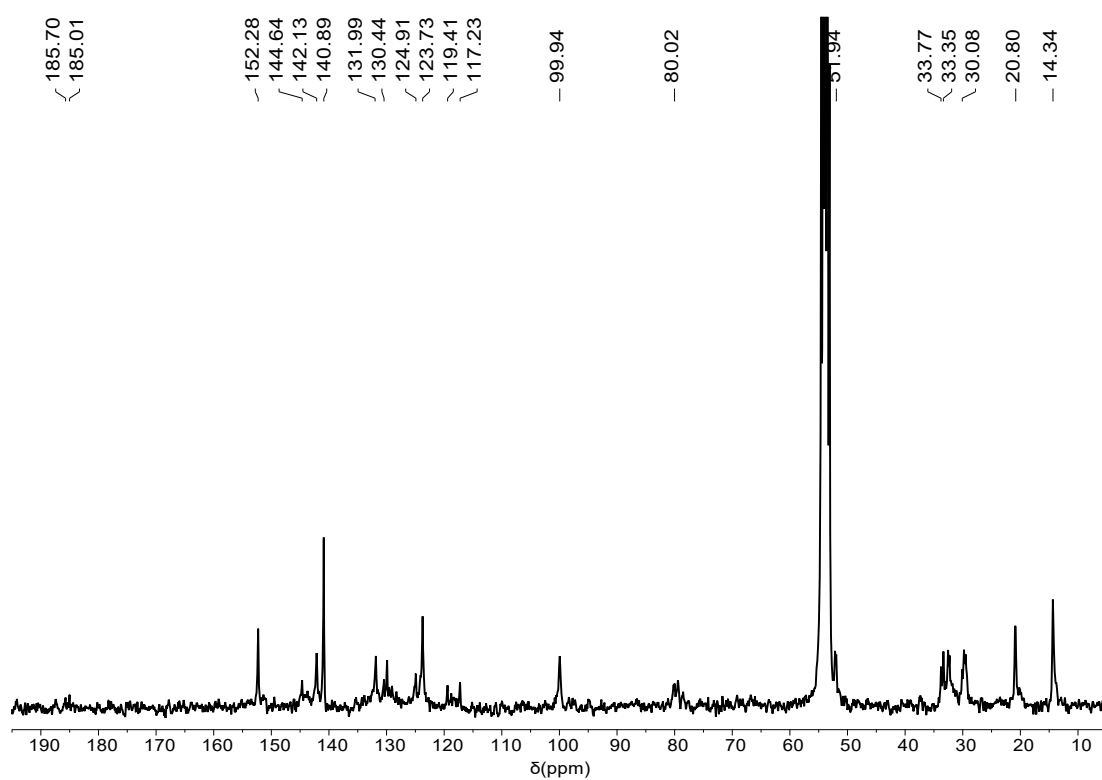

**Figure S16.**  $^{13}\text{C}$  NMR spectrum (75 MHz) of  $\text{C}_{60}@3$  in  $\text{CD}_2\text{Cl}_2$  at 298 K.

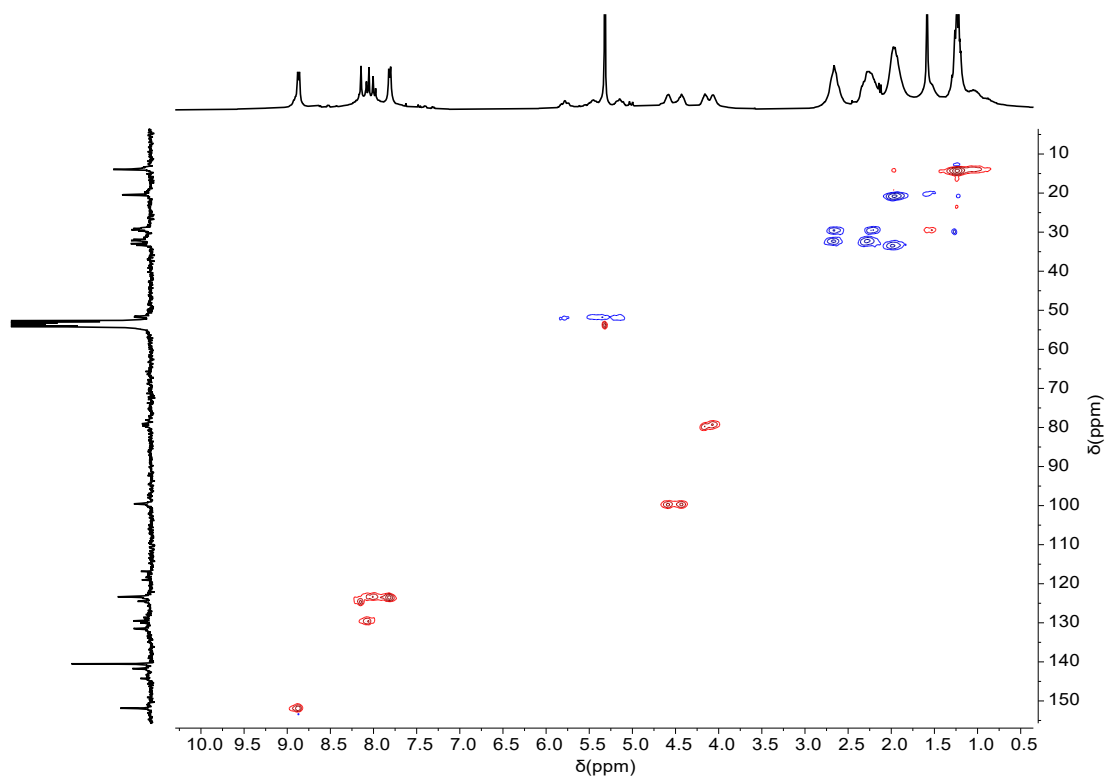

**Figure S17.**  $^1\text{H}$ - $^{13}\text{C}$  HSQC spectrum (300 MHz) of  $\text{C}_{60}@3$  in  $\text{CD}_2\text{Cl}_2$  at 298 K.

### 2.6. $^1\text{H}$ , $^{13}\text{C}$ , and $^1\text{H}$ - $^{13}\text{C}$ HSQC NMR spectra of $\text{C}_{70}@3$ .

8.87  
8.85  
8.17  
8.14  
8.11  
7.99  
7.83  
7.81  
-5.61  
-5.21  
-4.47  
-4.07  
-2.66  
-2.25  
-2.00  
-1.28

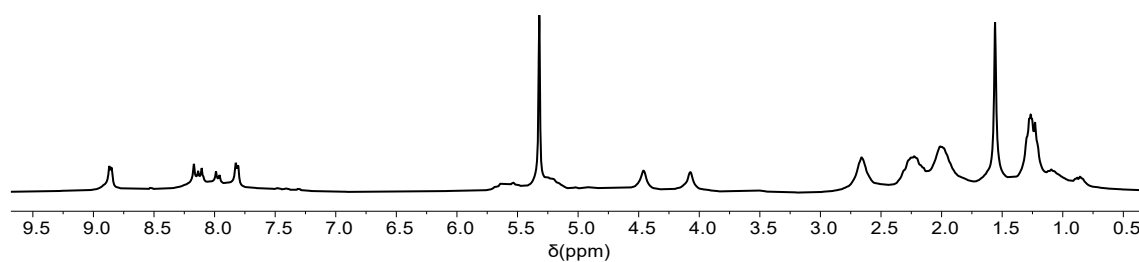

**Figure S18.**  $^1\text{H}$  NMR spectrum (300 MHz) of  $\text{C}_{70}@3$  in  $\text{CD}_2\text{Cl}_2$  at 298 K.

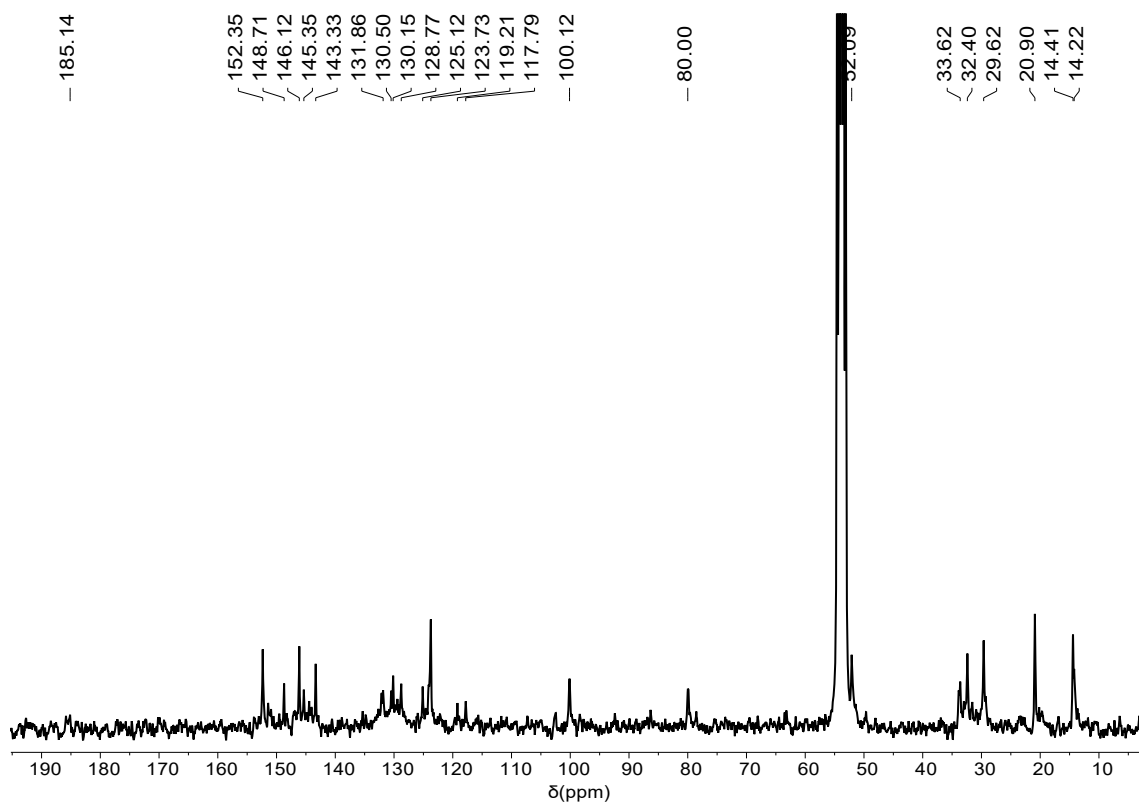

**Figure S19.**  $^{13}\text{C}$  NMR spectrum (75 MHz) of  $\text{C}_{70}@3$  in  $\text{CD}_2\text{Cl}_2$  at 298 K.

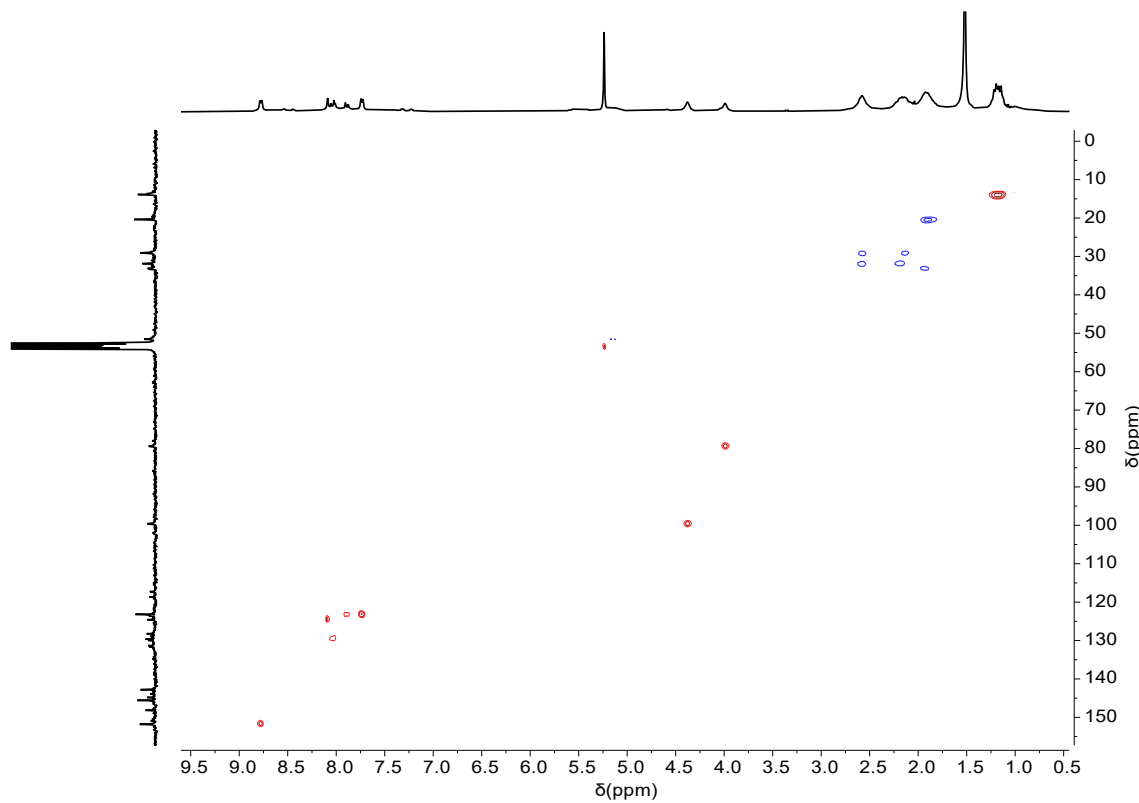

**Figure S20.**  $^1\text{H}$ - $^{13}\text{C}$  HSQC spectrum (300 MHz) of  $\text{C}_{70}@3$  in  $\text{CD}_2\text{Cl}_2$  at 298 K.



### 3. Cyclic voltammetry studies

In all experiments,  $[\text{NBu}_4](\text{PF}_6)$  (0.1 M in dry  $\text{CH}_2\text{Cl}_2$ ) was used as the supporting electrolyte with analyze concentration of approximately 1 mM. Measurements were performed at  $50 \text{ mVs}^{-1}$  scan rates. All redox potentials were referenced to the  $\text{Fc}/\text{Fc}^+$  couple as internal standard with  $E_{1/2}(\text{Fc}/\text{Fc}^+) \text{ vs. SCE} = +0.44 \text{ V}$ .

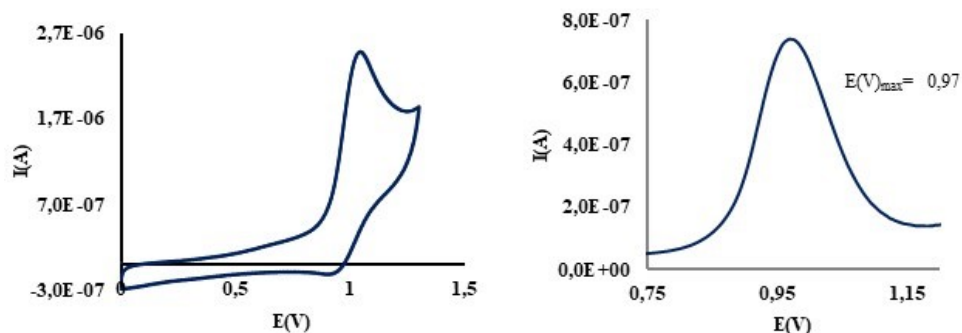

**Figure S21.** CV plot (left) and relevant DPV section (right) of complex **1**.

### 4. IR spectroscopy studies

We prepared a solution of the complex **2** at 10 mM of  $\text{CH}_2\text{Cl}_2$  in FT/IR-6200 (Jasco) spectrometer.

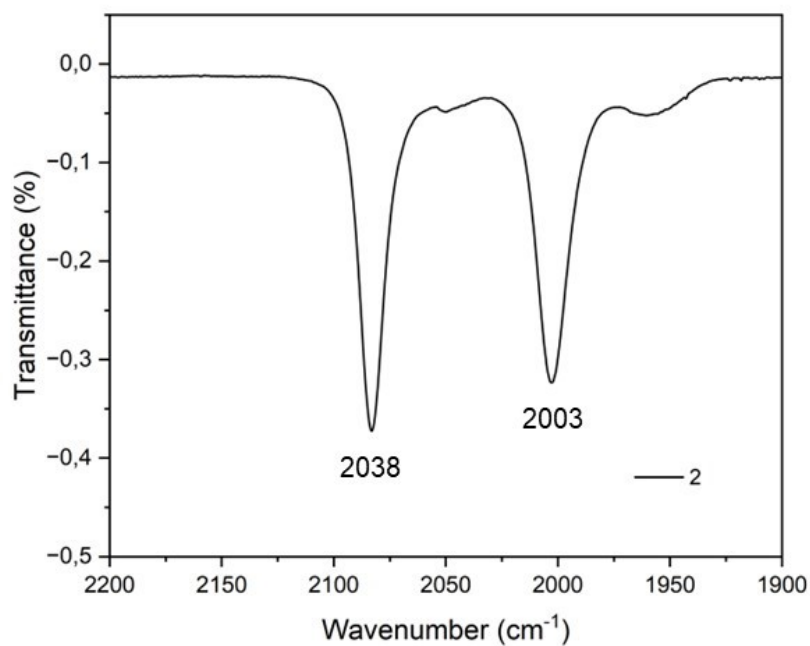

**Figure S22.** Infrared spectra recorded for complex **2**.

## 5. X-Ray Crystallography

**X-Ray Diffraction studies for complexes C<sub>60</sub>@3.** Crystals suitable for X-ray studies of C<sub>60</sub>@3 was obtained by slow diffusion of hexane into a concentrated solution of the complex in acetone. Diffraction data of C<sub>60</sub>@3 were recorded at 100(2) K on a Bruker D8 Venture diffractometer, using graphite-monochromated Mo K $\alpha$  radiation ( $\lambda = 0.71073$  Å). Single crystals were mounted on a MiTeGen polymer tip and protected with perfluoropolyether oil. Data were collected using  $\omega$ - and  $\phi$ -scans in with narrow oscillation frame strategies. Diffracted intensities were integrated and corrected of absorption effects by using a multi-scan method using SAINT,<sup>2</sup> and SADABS,<sup>3</sup> programs, as included in the APEX4 package. The structure was solved by direct methods with SHELXS<sup>4</sup> and refined by full-matrix least squares on  $F^2$  with SHELXL,<sup>5</sup> and the WinGX system.<sup>6</sup> Hydrogen atoms have been included in the model in calculated positions and refined with a riding model. DFIX restraints were applied to five selected interatomic distances at the end of two butyl groups and in acetone solvent molecules, whereas ISOR instructions were placed on two C-atoms at butyl groups. Key details of the crystal and structure refinement data are summarized in Supplementary Table S1.

The structure model of complex C<sub>60</sub>@3 shows the following A alerts after CheckCIF on Platon:

**Table S1.** Summary of crystal data, data collection, and structure refinement details

| <b>C<sub>60</sub>@3</b>                     |                                                                                                                 |
|---------------------------------------------|-----------------------------------------------------------------------------------------------------------------|
| Empirical formula                           | C <sub>203</sub> H <sub>178</sub> F <sub>24</sub> N <sub>12</sub> O <sub>5</sub> P <sub>4</sub> Rh <sub>4</sub> |
| Formula weight                              | 3857.08                                                                                                         |
| Temperature/K                               | 100(2)                                                                                                          |
| Crystal system                              | triclinic                                                                                                       |
| Space group                                 | P-1                                                                                                             |
| a/Å                                         | 17.8348(14)                                                                                                     |
| b/Å                                         | 22.4557(19)                                                                                                     |
| c/Å                                         | 25.220(2)                                                                                                       |
| $\alpha$ /°                                 | 105.856(3)                                                                                                      |
| $\beta$ /°                                  | 107.732(2)                                                                                                      |
| $\gamma$ /°                                 | 105.180(2)                                                                                                      |
| Volume/Å <sup>3</sup>                       | 8573.1(12)                                                                                                      |
| Z                                           | 2                                                                                                               |
| $\rho_{\text{calc}}/\text{cm}^3$            | 1.494                                                                                                           |
| $\mu/\text{mm}^{-1}$                        | 0.506                                                                                                           |
| F(000)                                      | 3952                                                                                                            |
| Crystal size/mm <sup>3</sup>                | 8573.1(12)                                                                                                      |
| 2 $\theta$ range for data collection        | 2.32 – 25.28                                                                                                    |
| Index ranges                                | $-23 \leq h \leq 23, -30 \leq k \leq 29, -33 \leq l \leq 33$                                                    |
| Reflections collected                       | 446977                                                                                                          |
| Independent reflections                     | 42939                                                                                                           |
| Data/restraints/parameters                  | 42939/29/2286                                                                                                   |
| Goodness-of-fit on F <sup>2</sup>           | 1.020                                                                                                           |
| Final R indexes<br>[I>2 $\sigma$ (I)]       | 0.1129                                                                                                          |
| Final R indexes<br>[all data]               | 0.3582                                                                                                          |
| Largest diff. peak/hole / e Å <sup>-3</sup> | 2.454 / -1.410                                                                                                  |

## 6. Photophysical properties

### 6.1. UV-visible absorption spectra

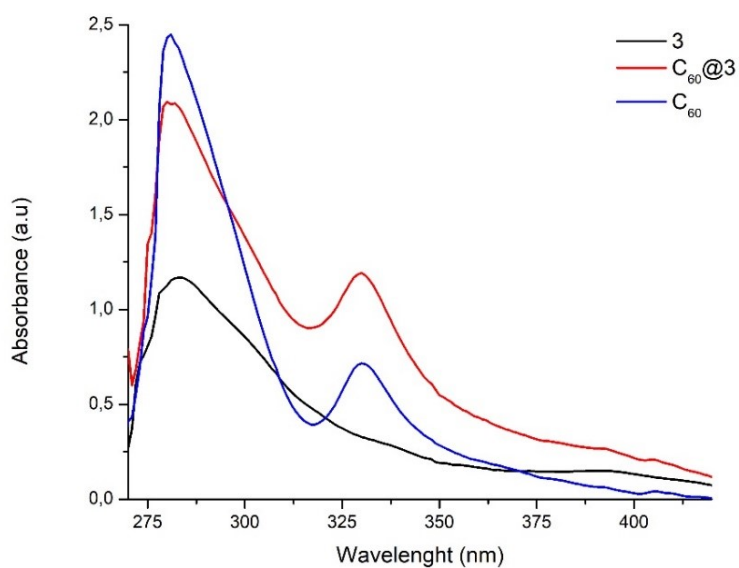

**Figure S23.** UV-visible absorption spectra of complexes **3**,  $C_{60}$  and  $C_{60}@3$ , recorded in chloroform-toluene (9:1) at a concentration of  $10^{-5}$  M, under aerobic conditions at room temperature.

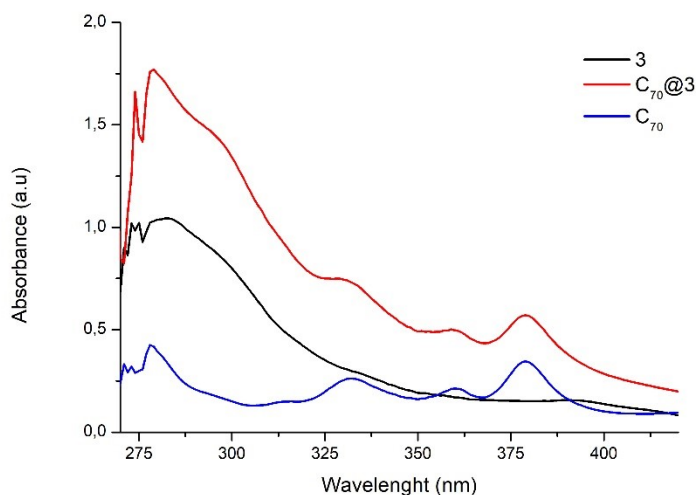

**Figure S24.** UV-visible absorption spectra of complexes **3**,  $C_{70}$  and  $C_{70}@3$ , recorded in chloroform-toluene (9:1) at a concentration of  $10^{-5}$  M, under aerobic conditions at room temperature.

## 6.2. Emission spectra

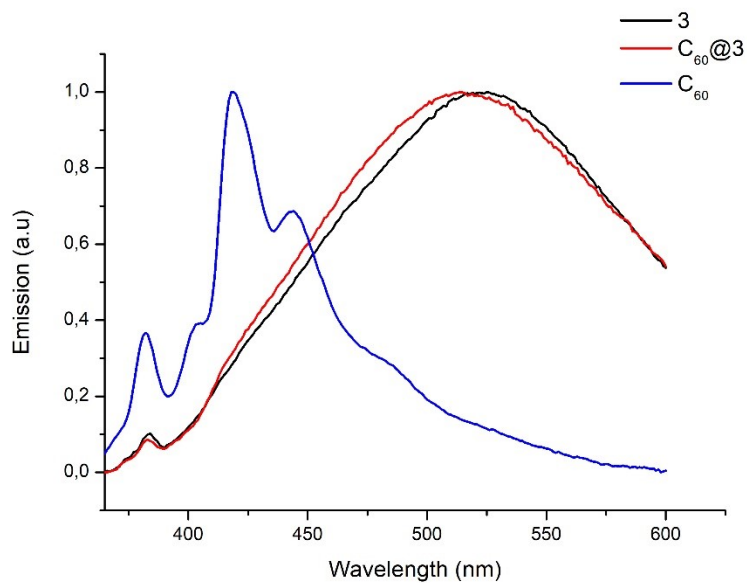

**Figure S25.** Normalized emission spectra of complexes **3**, C<sub>60</sub> and C<sub>60</sub>@**3**, at 345 nm in chloroform-toluene (9:1) at a concentration of 10<sup>-5</sup> M, under aerobic conditions at room temperature.

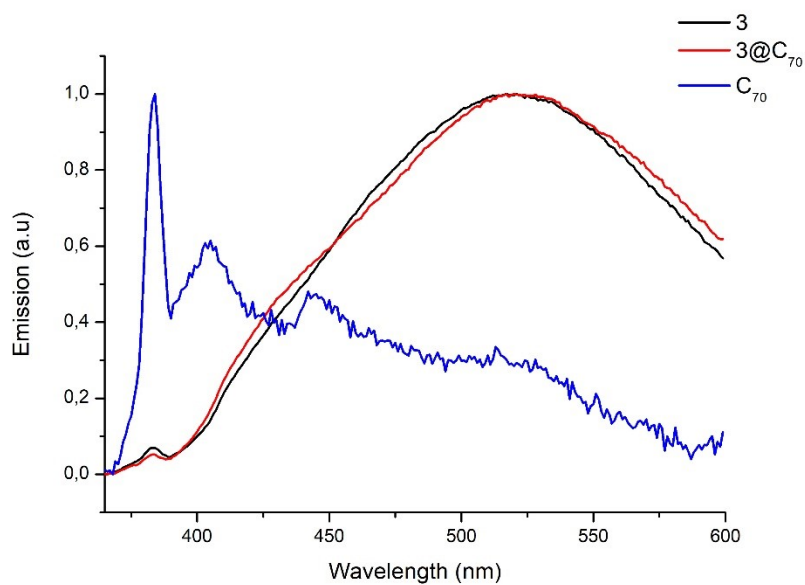

**Figure S26.** Normalized emission spectra of complexes **3**, C<sub>70</sub> and C<sub>70</sub>@**3**, at 345 nm in chloroform-toluene (9:1) at a concentration of 10<sup>-5</sup> M, under aerobic conditions at room temperature.

## 7. Titration experiments

### 7.1. <sup>1</sup>H NMR titration experiments

The recognition capability of complex **1** (host) was studied by <sup>1</sup>H NMR titration experiments, by adding increasing amounts of C<sub>60</sub>, C<sub>70</sub> and coronene (guest) to a solution of complex **1**. The experiment was carried out in toluene-*d*<sub>8</sub>, at constant concentrations of the host (1.0 mM). Two solutions were prepared: solution A (only containing host at 1.0 mM) and solution B (containing host at 1.0 mM and guest at different mM). The addition of increasing amounts of solution B to solution A produced perturbations on the signal due to the proton of corannulene core of the host. The association constants were calculated by nonlinear least-square analysis, by using the BindFitv0.5 program. The data was fitted to the 2:1 binding model.

#### Titration of **1** with C<sub>60</sub>

**Table S2.** Data values from the titration study of **1** with C<sub>60</sub>

| [ <b>1</b> ] M | [C <sub>60</sub> ] M | δ <sub>c<sub>H</sub></sub> | δ <sub>c<sub>H</sub></sub> | δ <sub>c<sub>H</sub></sub> | equiv. C <sub>60</sub> |
|----------------|----------------------|----------------------------|----------------------------|----------------------------|------------------------|
| 0,00101798     | 0                    | 7,98                       | 7,92                       | 7,72                       | 0                      |
| 0,00101798     | 0,00031489           | 8,02                       | 7,93                       | 7,73                       | 0,3                    |
| 0,00101798     | 0,00060646           | 8,06                       | 7,94                       | 7,73                       | 0,6                    |
| 0,00101798     | 0,0008772            | 8,1                        | 7,95                       | 7,74                       | 0,9                    |
| 0,00101798     | 0,00112926           | 8,12                       | 7,96                       | 7,74                       | 1,1                    |
| 0,00101798     | 0,00158461           | 8,14                       | 7,97                       | 7,74                       | 1,6                    |
| 0,00101798     | 0,00198477           | 8,15                       | 7,97                       | 7,74                       | 1,9                    |
| 0,00101798     | 0,0026553            | 8,16                       | 7,98                       | 7,75                       | 2,6                    |
| 0,00101798     | 0,00319499           | 8,17                       | 7,98                       | 7,75                       | 3,1                    |
| 0,00101798     | 0,00383229           | 8,17                       | 7,98                       | 7,75                       | 3,7                    |
| 0,00101798     | 0,00446573           | 8,17                       | 7,98                       | 7,75                       | 4,4                    |
| 0,00101798     | 0,00493829           | 8,17                       | 7,98                       | 7,75                       | 4,8                    |
| 0,00101798     | 0,00545811           | 8,17                       | 7,98                       | 7,75                       | 5,4                    |

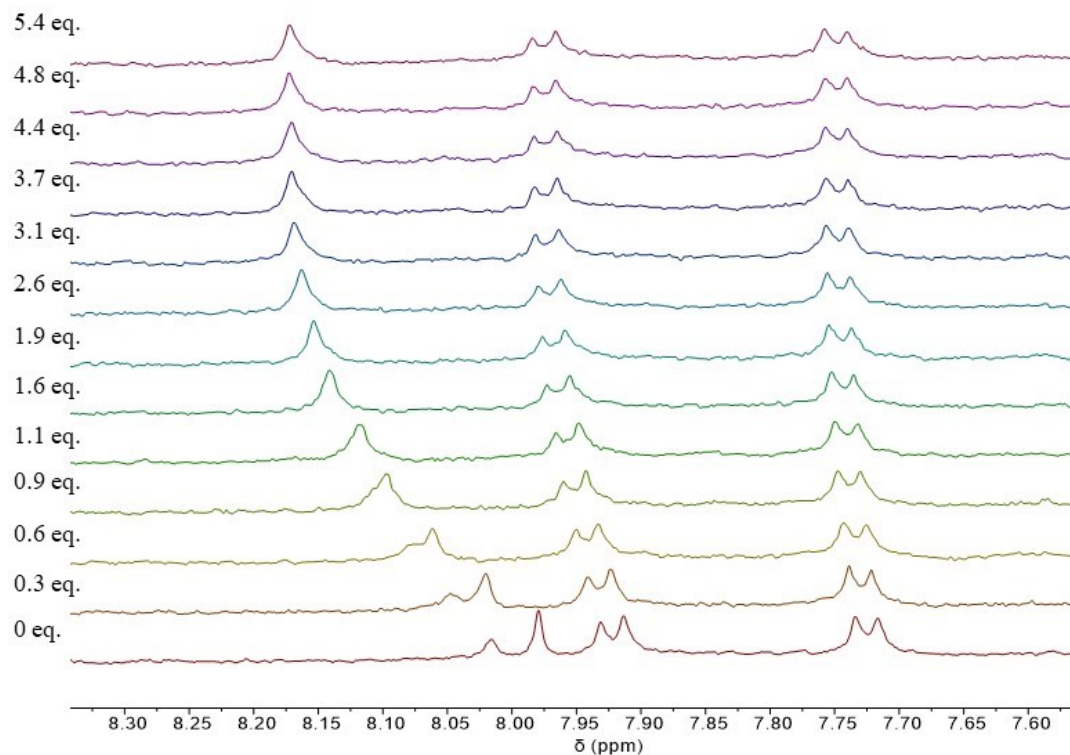

**Figure S27.** Selected region and spectra (500 MHz, toluene- $d_8$ , 298 K) of the titration of complex **1** with  $C_{60}$ .

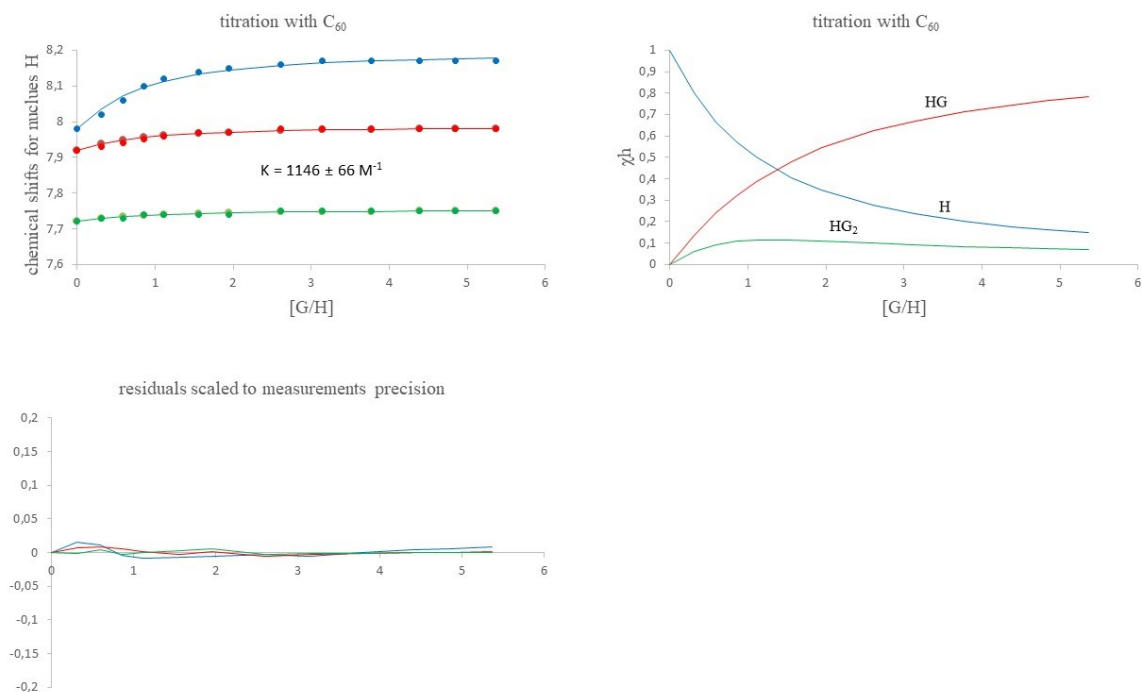

**Figure S28.** Non-linear least-squares fitting of the chemical shift changes of H during titration experiments of **1** with  $C_{60}$ . The Figure on the left represents the speciation profiles.

## Titration of 1 with C<sub>70</sub>

**Table S3.** Data values from the titration study of 1 with C<sub>70</sub>

| [1] M      | [C <sub>70</sub> ] M | $\delta c_H$ | equiv. C <sub>70</sub> |
|------------|----------------------|--------------|------------------------|
| 0,00114523 | 0                    | 7,98         | 0                      |
| 0,00114523 | 0,00021501           | 8            | 0,2                    |
| 0,00114523 | 0,00041409           | 8,03         | 0,4                    |
| 0,00114523 | 0,00059896           | 8,05         | 0,5                    |
| 0,00114523 | 0,00077107           | 8,07         | 0,7                    |
| 0,00114523 | 0,00108198           | 8,1          | 0,9                    |
| 0,00114523 | 0,00135521           | 8,11         | 1,2                    |
| 0,00114523 | 0,00181305           | 8,12         | 1,6                    |
| 0,00114523 | 0,00218156           | 8,12         | 1,9                    |
| 0,00114523 | 0,00261671           | 8,13         | 2,3                    |
| 0,00114523 | 0,00304923           | 8,13         | 2,7                    |
| 0,00114523 | 0,00337189           | 8,13         | 2,9                    |
| 0,00114523 | 0,00372683           | 8,13         | 3,3                    |



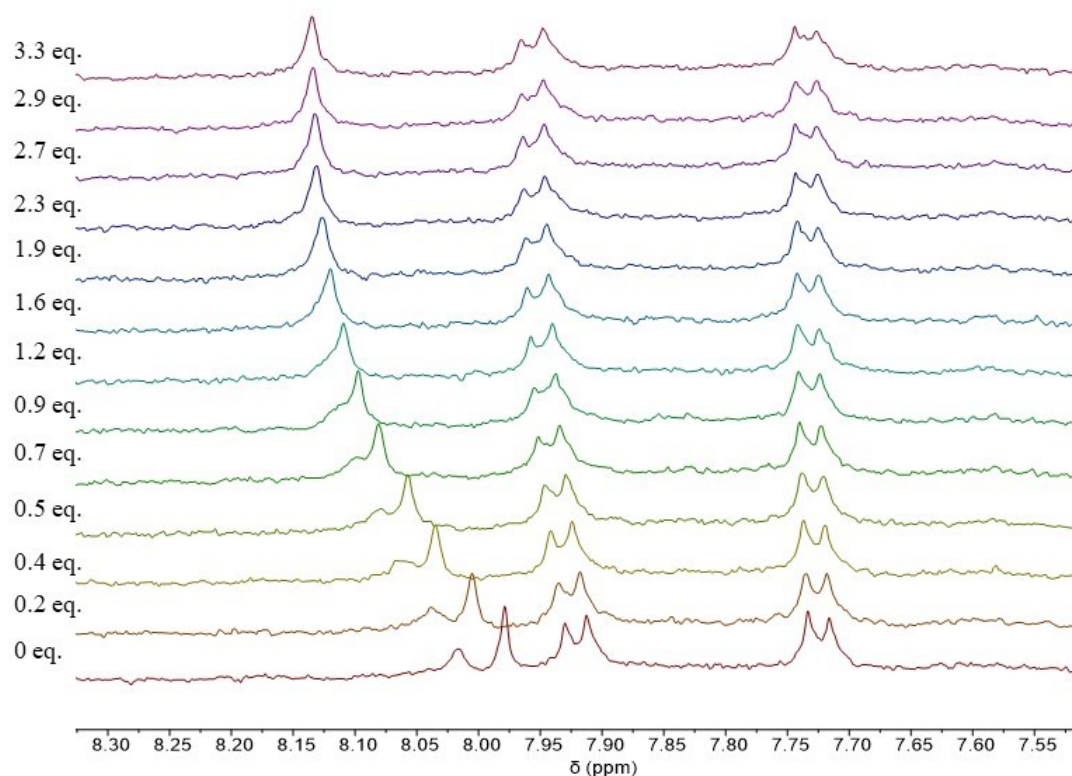

**Figure S29.** Selected region and spectra (500 MHz, toluene- $d_8$ , 298 K) of the titration of complex **1** with  $C_{70}$ .

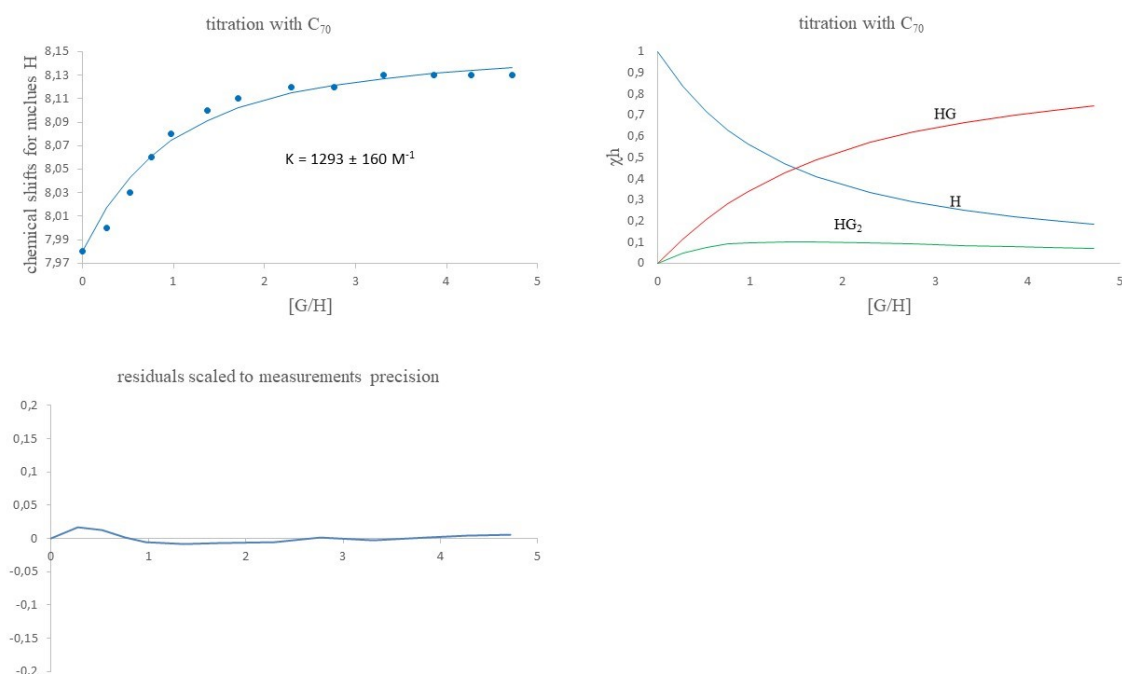

**Figure S30.** Non-linear least-squares fitting of the chemical shift changes of H during titration experiments of **1** with  $C_{70}$ . The Figure on the left represents the speciation profiles.

## 7.2 ITC titration experiments

Titration of the host **1** with  $C_{60}$  or  $C_{70}$  was carried out in toluene by the addition of small aliquots of  $C_{60}$  (8  $\mu\text{L}$ ) of a solution of the guest (2.7 mM) into a solution of the host (0.6 mM). The solutions were prepared in spectroscopic grade solvents and equilibrated for 24 h at room temperature before use. The titrations were duplicated independently, and isotherm fittings were used to calculate the average  $K_a$  and  $\Delta H$  with relevant standard errors. Isothermal titration was performed on a TA Nano Isothermal Titration Calorimeter at 25  $^{\circ}\text{C}$ . A hastelloy cell was used with an active cell volume 182  $\mu\text{L}$ . The stirring speed was set at 150 rpm. The association constant was obtained from the fit of the titration data to a 1:2 binding model using the TA Nano Isothermal Titration Calorimeter indicating the  $C_{60}$  or  $C_{70}$  were placed in the syringe. The two sites are assumed to be non-cooperative.

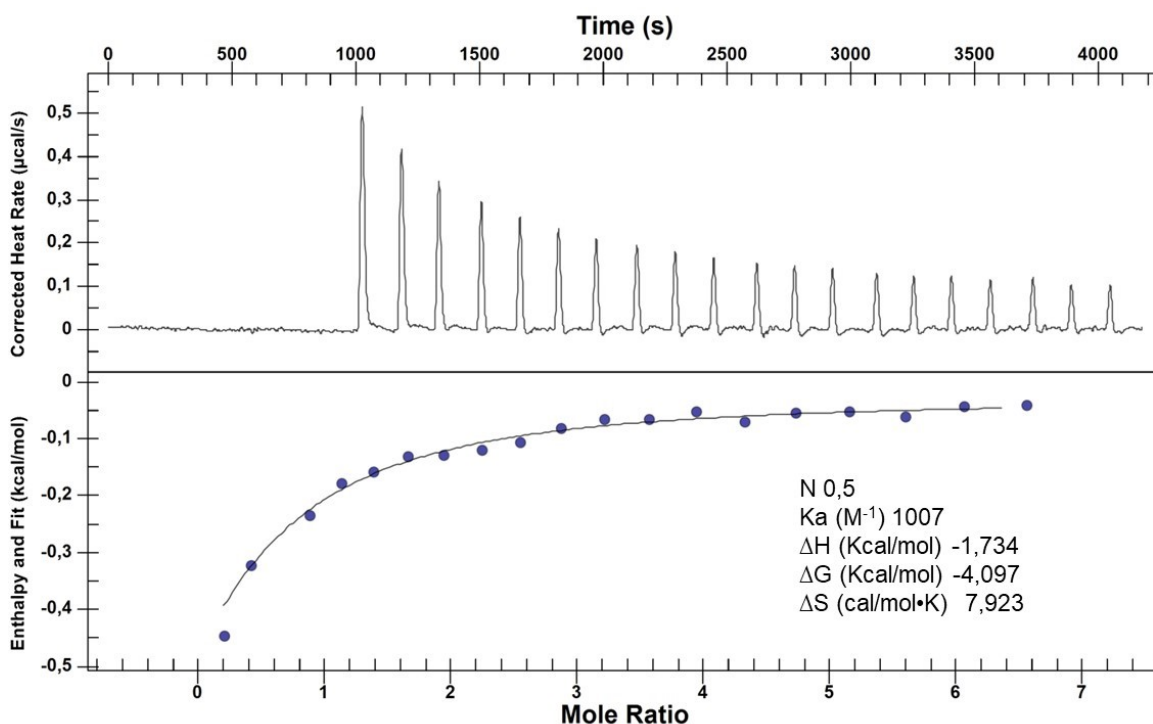

**Figure S31.** Heat vs. time plot for the titration of guest  $C_{60}$  into host **1**. One set of site binding isotherm (black line) fit to the experimental data if the complex of higher stoichiometry formed by the two binding partners is  $C_{60}@1$ .

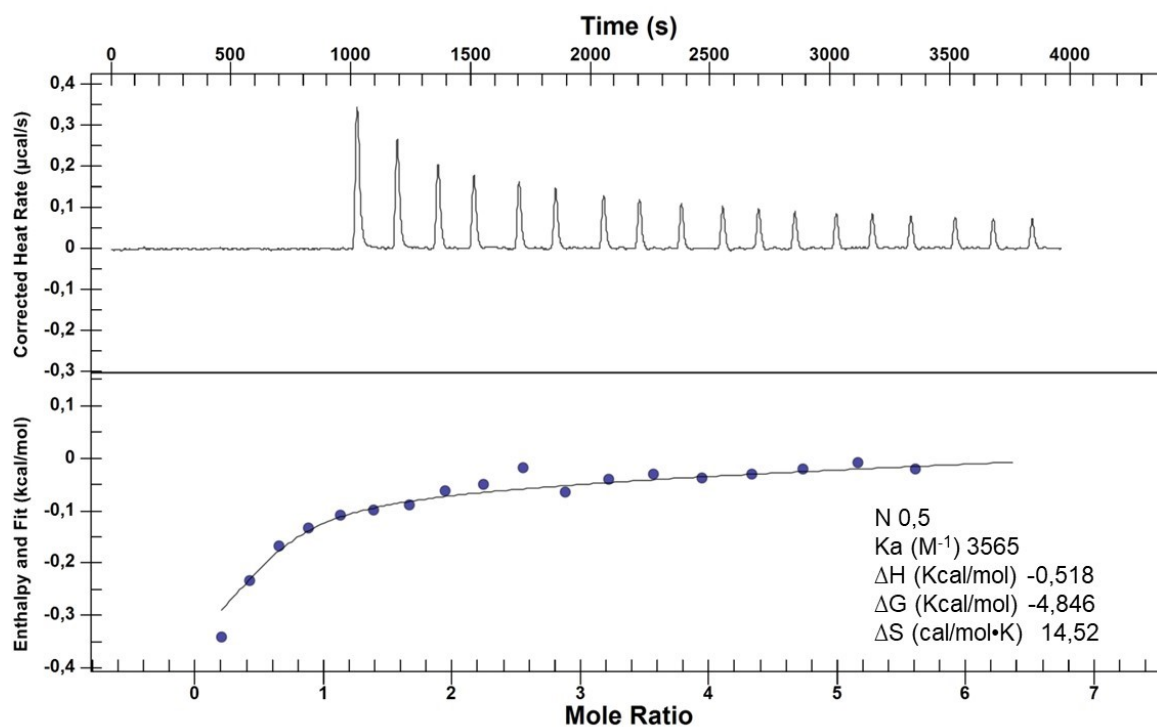

**Figure S32.** Heat vs. time plot for the titration of guest  $C_{70}$  into host **1**. One set of site binding isotherm (blank line) fit to the experimental data if the complex of higher stoichiometry formed by the two binding partners is  $C_{70}@1$ .

### 8. Encapsulation experiments with fullerenes.

A solution of **3** in  $CD_2Cl_2$  (17.22 mM) was placed in an NMR tube. Then, the corresponding fullerene ( $C_{60}$  or  $C_{70}$ ) was added (17.22 mM), and the suspension was placed in an ultrasonic bath. NMR spectra were recorded after different hours of sonication. After 24 hours, the formation of the host-guest adducts (fullerene@**3**) was complete.

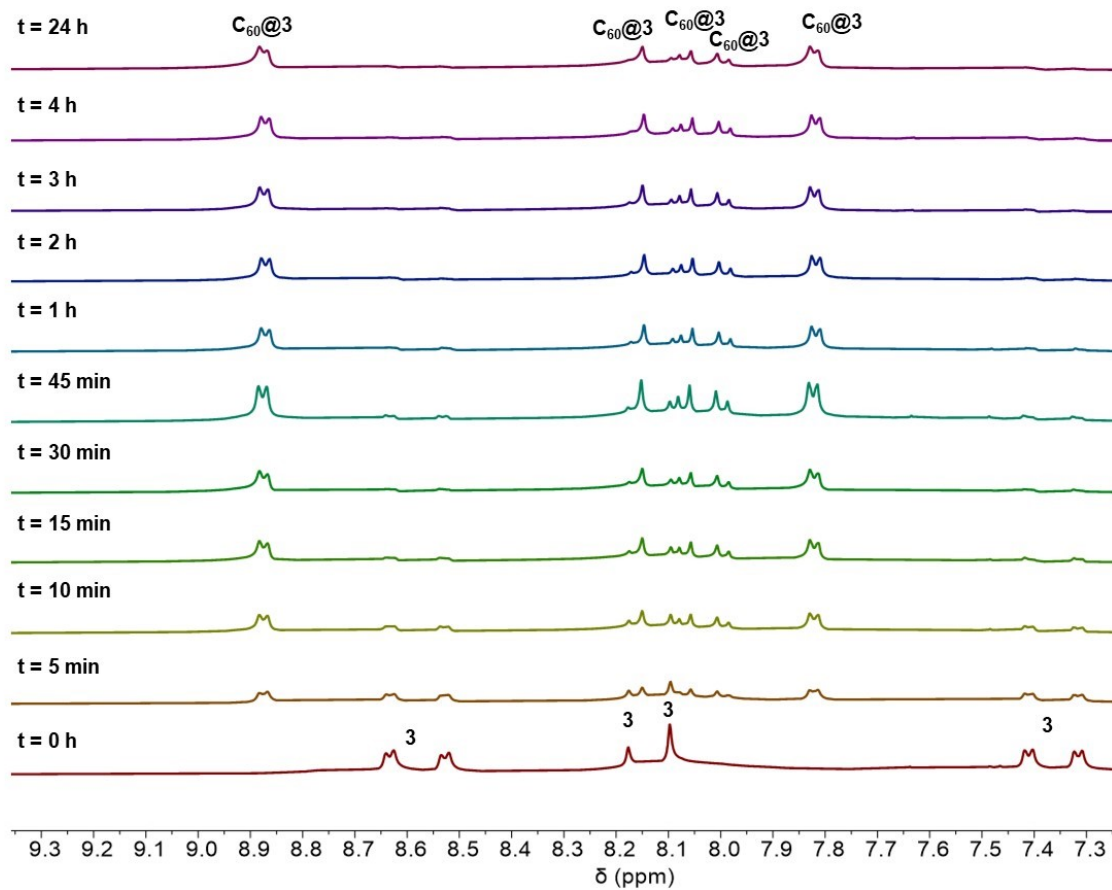

**Figure S33.** Selected region of the  $^1\text{H}$  NMR spectra (400 MHz) of the encapsulation of  $\text{C}_{60}$  in metallobox **3**, in  $\text{CD}_2\text{Cl}_2$ , at different times.

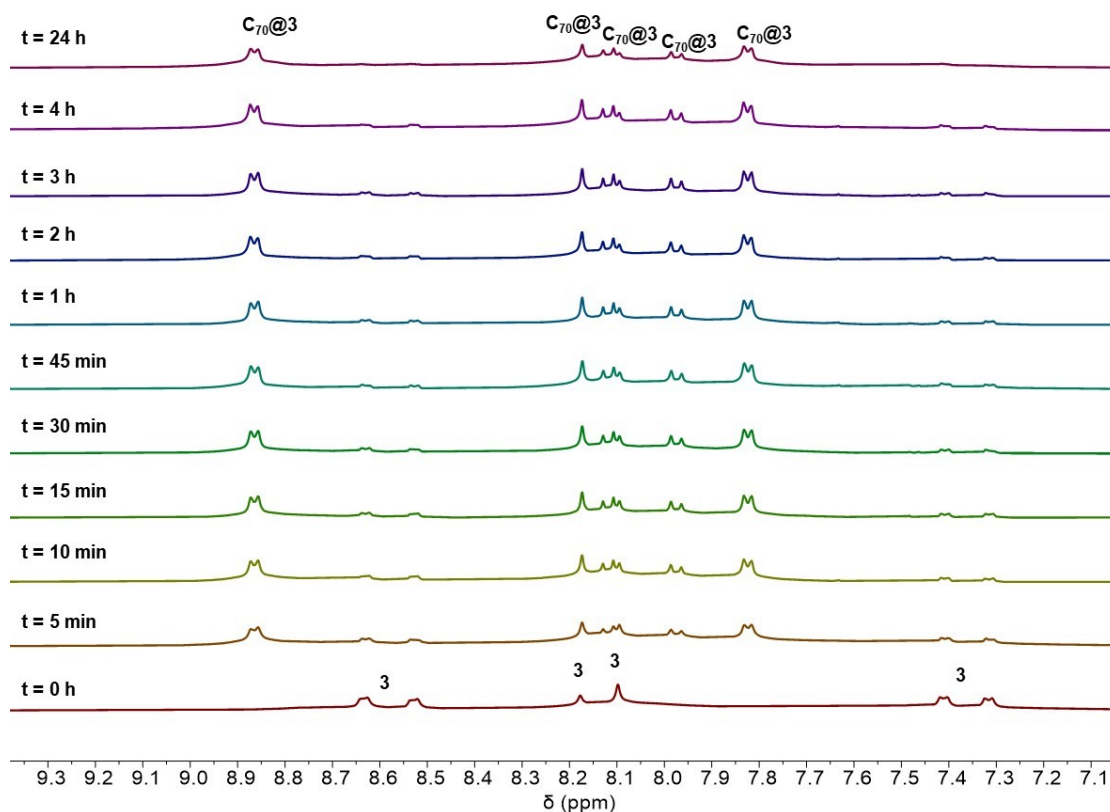

**Figure S34.** Selected region of the  $^1\text{H}$  NMR spectra (400 MHz) of the encapsulation of  $\text{C}_{70}$  in metallobox **3**, in  $\text{CD}_2\text{Cl}_2$ , at different times.

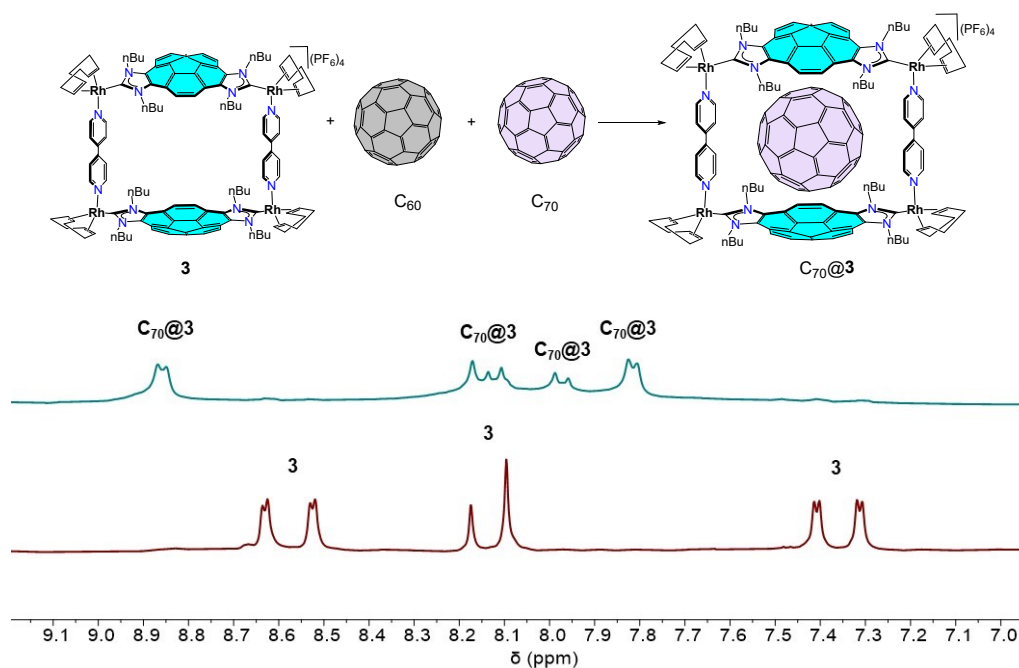

**Figure S35.** Selected region of the  $^1\text{H}$  NMR spectra (300 MHz) of the competitive experiment encapsulation between **3**,  $\text{C}_{60}$ , and  $\text{C}_{70}$  in  $\text{CD}_2\text{Cl}_2$ .

## 9. Variable-temperature $^1\text{H}$ NMR experiments

A solution of **3** in  $\text{C}_2\text{D}_2\text{Cl}_4$  (6.75 mM) was placed in an NMR tube. Then, the corresponding fullerene ( $\text{C}_{60}$ ) was added (6.75 mM), and the suspension was placed in an ultrasonic bath. NMR spectra were recorded after different temperatures.

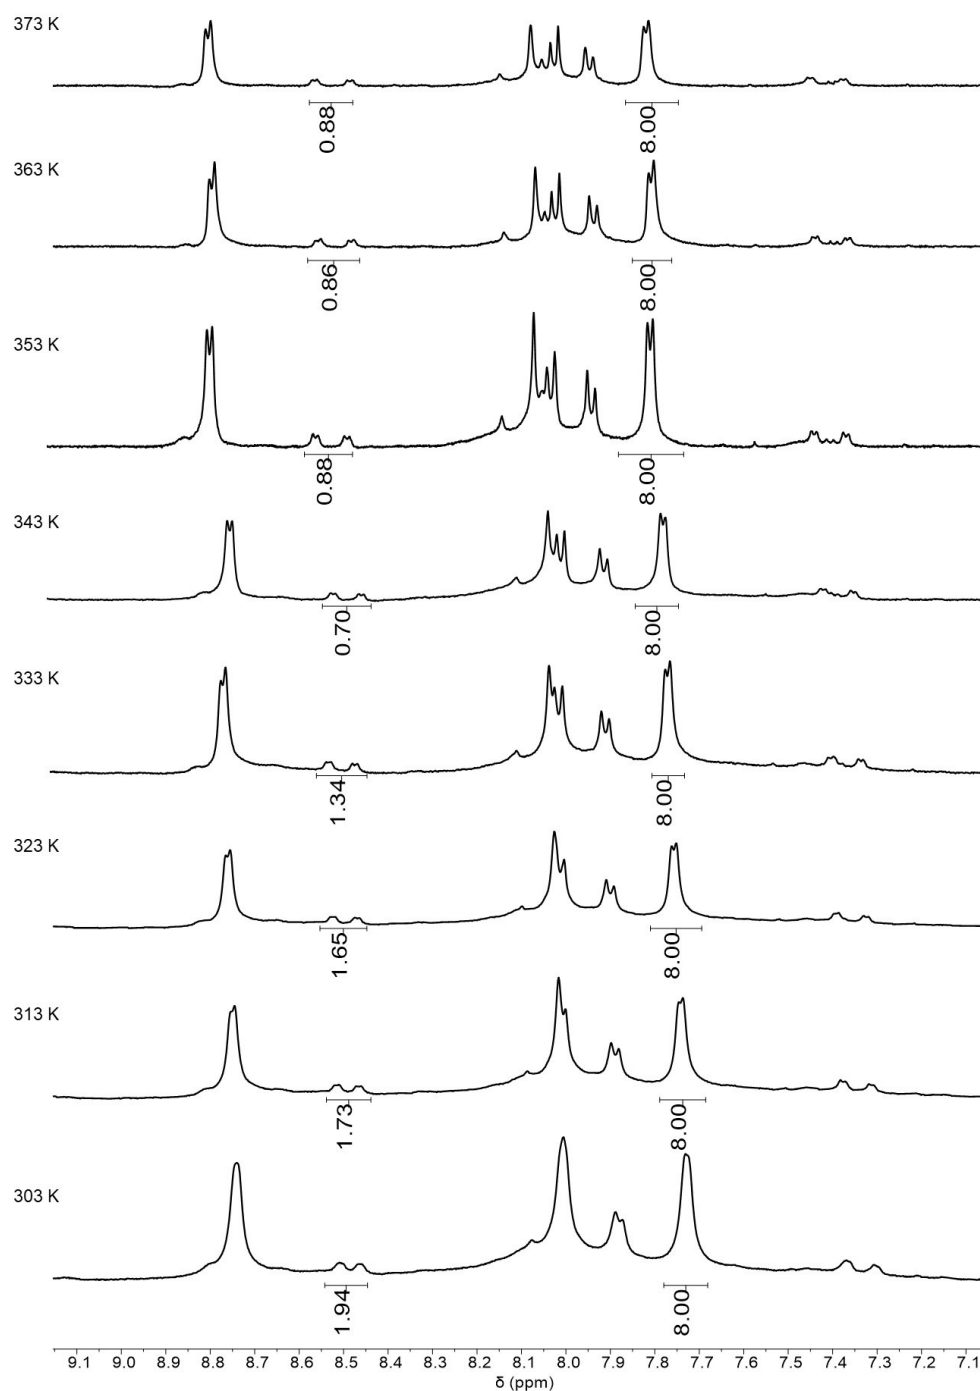

**Figure S36.** Selected region of the  $^1\text{H}$  NMR spectra (500 MHz) of complex  $\text{C}_{60}@3$  in  $\text{C}_2\text{D}_2\text{Cl}_4$  at different temperatures.

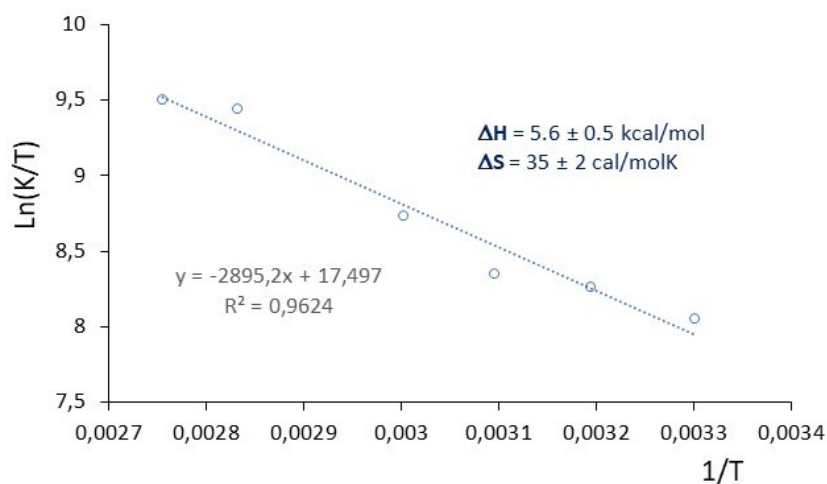

**Figure S37.** Van't Hoff plot resulting from the calculation of the equilibrium constants between **3** and  $C_{60}$  obtained from the  $^1\text{H}$  NMR spectra ( $C_2D_2Cl_4$ ) in a temperature range between 303-373 K.

## 10. DOSY experiments

The experiments were carried out in  $CD_2Cl_2$ , at constant concentrations of 5 mM on a Varian Innova 500 MHz.

| Complexes  | G (m <sup>2</sup> /s)  |
|------------|------------------------|
| <b>1</b>   | 8.30 10 <sup>-10</sup> |
| <b>3</b>   | 7.04 10 <sup>-10</sup> |
| $C_{60}@3$ | 6.64 10 <sup>-10</sup> |
| $C_{70}@3$ | 6.05 10 <sup>-10</sup> |

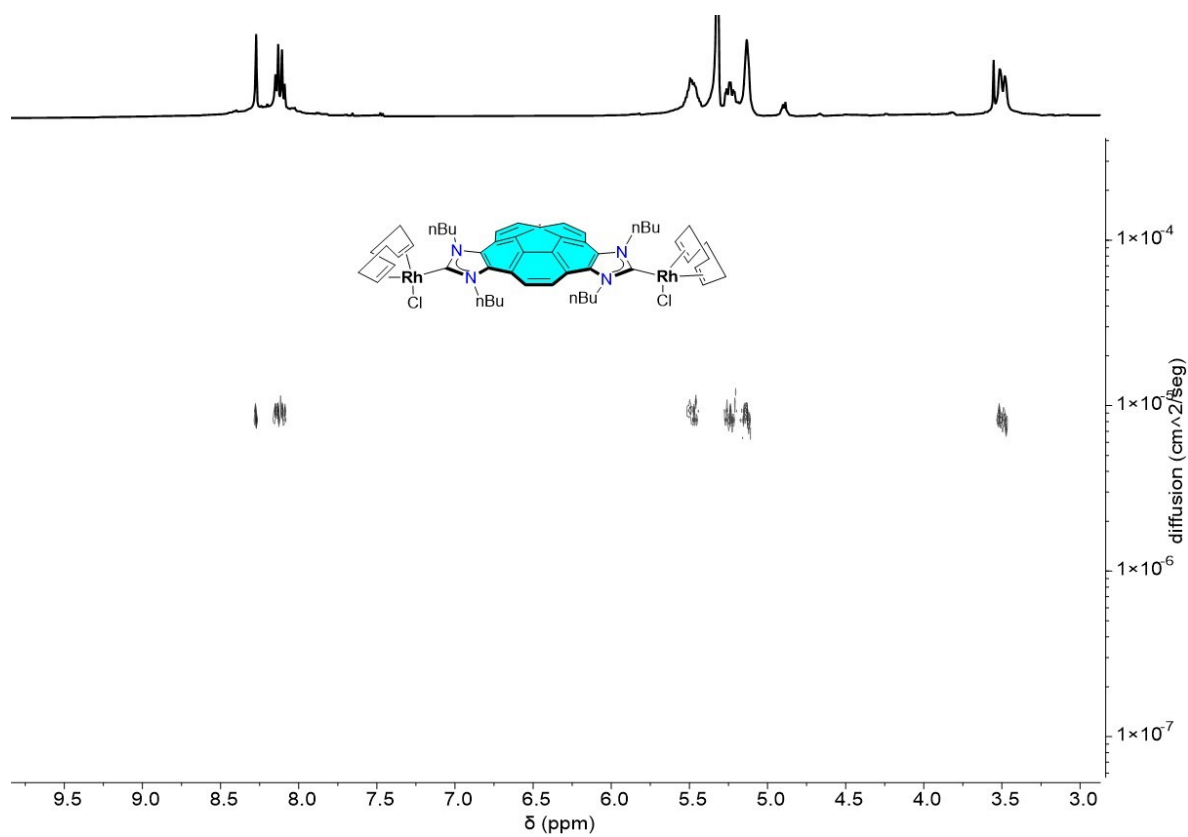

**Figure S38.** DOSY NMR spectrum (500 MHz) of **1** in  $\text{CD}_2\text{Cl}_2$ .

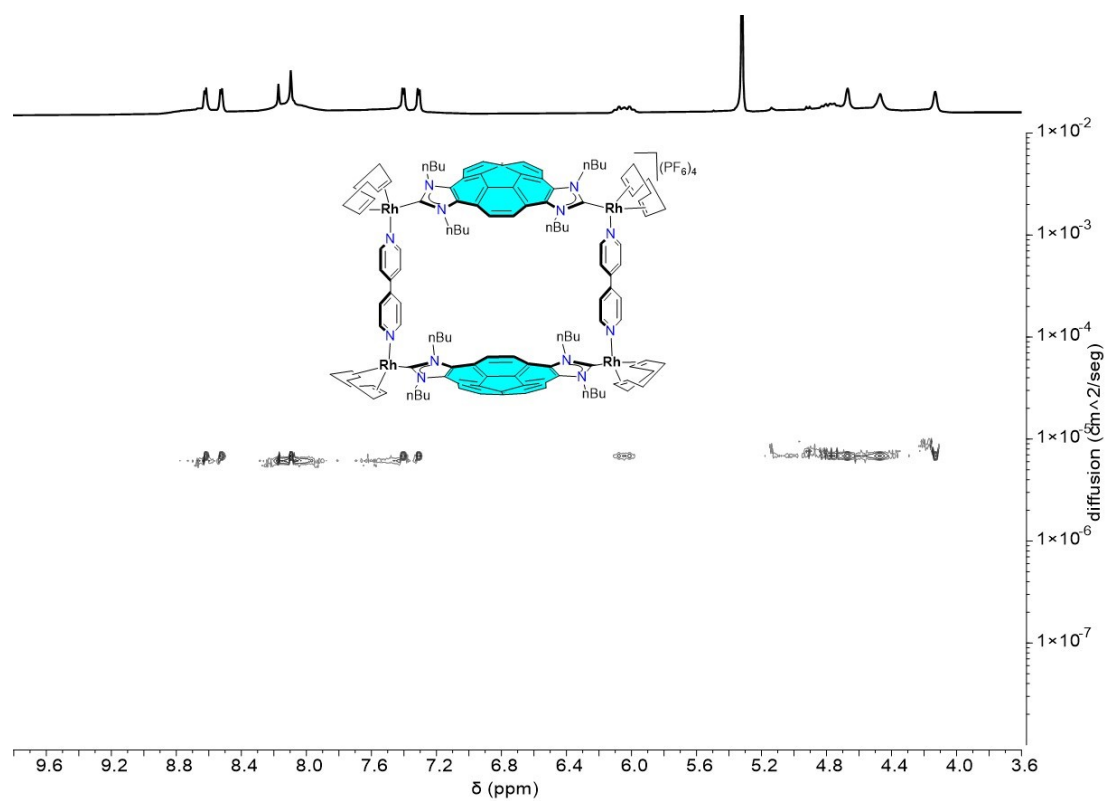

**Figure S39.** DOSY NMR spectrum (500 MHz) of **3** in  $\text{CD}_2\text{Cl}_2$ .



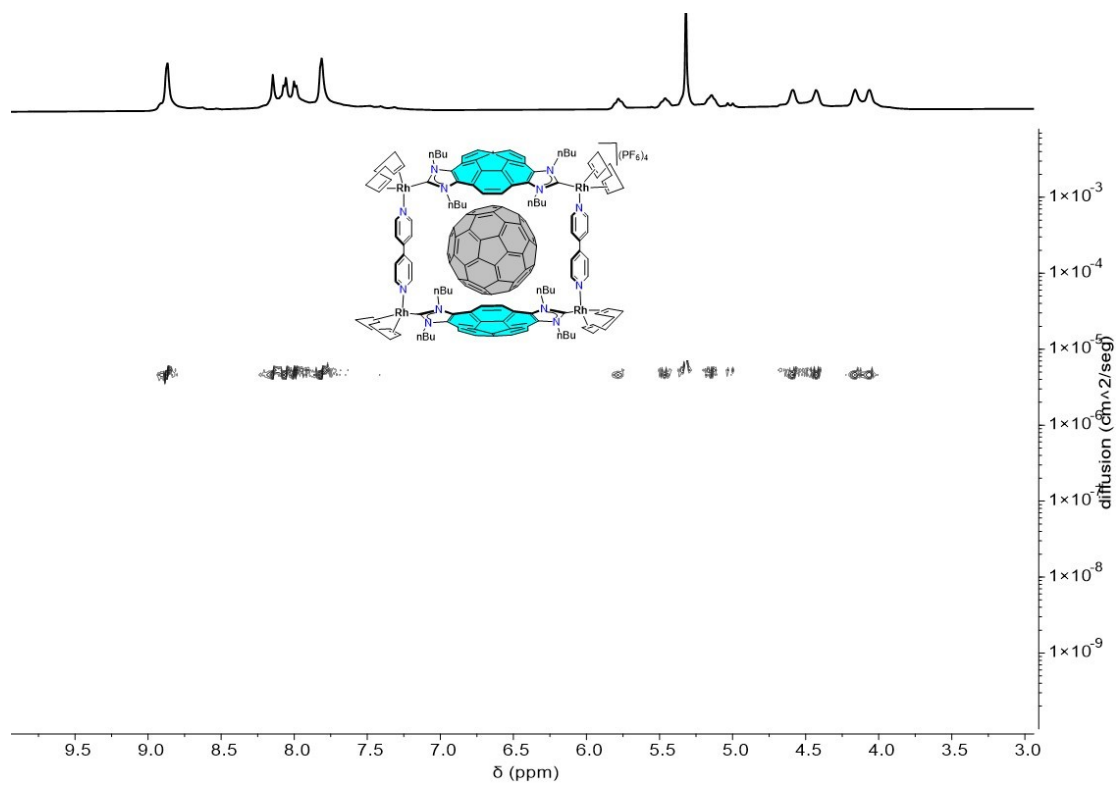

**Figure S40.** DOSY NMR spectrum (500 MHz) of  $C_{60}@3$  in  $CD_2Cl_2$ .

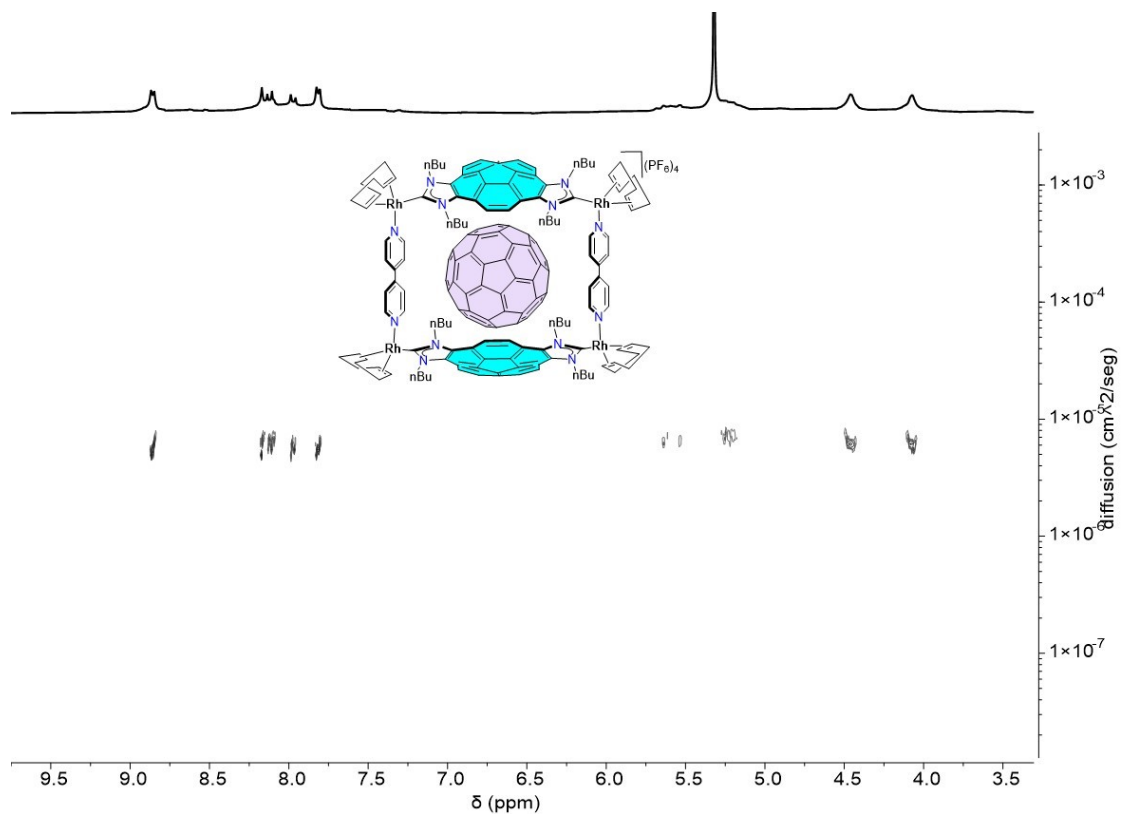

**Figure 41.** DOSY NMR spectrum (500 MHz) of  $C_{70}@3$  in  $CD_2Cl_2$ .

## 11. References

1. C. Mejuto, L. Escobar, G. Guisado-Barrios, P. Ballester, D. Gusev and E. Peris, Self-Assembly of Di-N-Heterocyclic Carbene-Gold-Adorned Corannulenes on C60, *Chem. Eur. J.*, 2017, **23**, 10644-10651.
2. v. SAINT+, in *Area-Detector Integration Software; Bruker AXS*, Madison, WI, 2001.
3. SADABS, in *Area-Detector Absorption Program, Bruker AXS*, Madison, WI, 1996.
4. L. Krause, R. Herbst-Irmer, G. M. Sheldrick and D. Stalke, Comparison of silver and molybdenum microfocus X-ray sources for single-crystal structure determination, *J. Appl. Crystallogr.*, 2015, **48**, 3-10.
5. G. M. Sheldrick, A short history of SHELX, *Acta Crystallographica Section A*, 2008, **64**, 112-122.
6. G. M. Sheldrick, SHELXT - Integrated space-group and crystal-structure determination, *Acta Crystallographica Section A*, 2015, **71**, 3-8.
